# Supplementary material for: Long-term neuropsychological trajectories in children with epilepsy: does surgery halt decline?
Source: PubMed Central journal article supplement (PMC11292899; doi:10.1093/brain/awae121), 2024-04-20
Supplement: awae121_supplementary_data.pdf [file awae121_supplementary_data.pdf]

Supplementary material associated with the manuscript, “**Long-term neuropsychological trajectories in children with epilepsy: Does surgery halt decline?**”

**Supplementary Table 1.** Neuropsychological tests.

| <b>Test</b>  | <b>Test version</b> | <b>Neuropsychological domain</b> | <b>Test subscale</b>                       |
|--------------|---------------------|----------------------------------|--------------------------------------------|
| <b>WISC</b>  | <b>V</b>            | FSIQ                             | Full-Scale IQ                              |
|              |                     | Verbal IQ                        | Verbal Comprehension Index                 |
|              |                     | Performance IQ                   | Fluid Reasoning Index                      |
|              |                     | Working Memory                   | Working Memory Index                       |
|              |                     | Processing Speed                 | Processing Speed Index                     |
| <b>WISC</b>  | <b>IV</b>           | FSIQ                             | Full-Scale IQ                              |
|              |                     | Verbal IQ                        | Verbal Comprehension Index                 |
|              |                     | Performance IQ                   | Perceptual Reasoning Index                 |
|              |                     | Working Memory                   | Working Memory Index                       |
|              |                     | Processing Speed                 | Processing Speed Index                     |
| <b>WISC</b>  | <b>III</b>          | FSIQ                             | Full-Scale IQ                              |
|              |                     | Verbal IQ                        | Verbal Comprehension Index <sup>a</sup>    |
|              |                     | Performance IQ                   | Perceptual Organisation Index <sup>b</sup> |
|              |                     | Working Memory                   | Working Memory Index <sup>c</sup>          |
|              |                     | Processing Speed                 | Processing Speed Index                     |
| <b>WPPSI</b> | <b>R</b>            | FSIQ                             | Full-Scale IQ                              |
|              |                     | Verbal IQ                        | Verbal IQ                                  |
|              |                     | Performance IQ                   | Performance IQ                             |
|              |                     | Working Memory                   | -                                          |
|              |                     | Processing Speed                 | -                                          |
| <b>WPPSI</b> | <b>IV</b>           | FSIQ                             | Full-Scale IQ                              |
|              |                     | Verbal IQ                        | Verbal Comprehension Index                 |
|              |                     | Performance IQ                   | Fluid Reasoning Index                      |
|              |                     | Working Memory                   | Working Memory Index                       |
|              |                     | Processing Speed                 | Processing Speed Index                     |
| <b>WPPSI</b> | <b>III</b>          | FSIQ                             | Full-Scale IQ                              |
|              |                     | Verbal IQ                        | Verbal IQ                                  |
|              |                     | Performance IQ                   | Performance IQ                             |
|              |                     | Working Memory                   | -                                          |
|              |                     | Processing Speed                 | Processing Speed Quotient                  |
| <b>WAIS</b>  | <b>IV</b>           | FSIQ                             | Full-Scale IQ                              |
|              |                     | Verbal IQ                        | Verbal Comprehension Index                 |
|              |                     | Performance IQ                   | Perceptual Reasoning Index                 |
|              |                     | Working Memory                   | Working Memory Index                       |
|              |                     | Processing Speed                 | Processing Speed Index                     |
| <b>WAIS</b>  | <b>R</b>            | FSIQ                             | Full-Scale IQ                              |

|             |            |                  |                                            |
|-------------|------------|------------------|--------------------------------------------|
|             |            | Verbal IQ        | Verbal IQ                                  |
|             |            | Performance IQ   | Performance IQ                             |
|             |            | Working Memory   | -                                          |
|             |            | Processing Speed | -                                          |
| <b>WAIS</b> | <b>IV</b>  | FSIQ             | Full-Scale IQ                              |
|             |            | Verbal IQ        | Verbal Comprehension Index                 |
|             |            | Performance IQ   | Perceptual Reasoning Index                 |
|             |            | Working Memory   | Working Memory Index                       |
|             |            | Processing Speed | Processing Speed Index                     |
| <b>WAIS</b> | <b>III</b> | FSIQ             | Full-Scale IQ                              |
|             |            | Verbal IQ        | Verbal Comprehension Index <sup>a</sup>    |
|             |            | Performance IQ   | Perceptual Organisation Index <sup>b</sup> |
|             |            | Working Memory   | Working Memory Index                       |
|             |            | Processing Speed | Processing Speed Index                     |
| <b>WASI</b> | <b>-</b>   | FSIQ             | Full-Scale IQ                              |
|             |            | Verbal IQ        | Verbal IQ                                  |
|             |            | Performance IQ   | Performance IQ                             |
|             |            | Working Memory   | -                                          |
|             |            | Processing Speed | -                                          |

<sup>a</sup> If Verbal Comprehension Index was not available, then Verbal IQ was used.

<sup>b</sup> If Perceptual Organisation Index was not available, then Performance IQ was used.

<sup>c</sup> If Working Memory Index was not available, then Freedom from Distractibility Index was used.

**Supplementary Table 2.** Available neuropsychology assessments, both before and after surgery ( $N = 500$ ).

| <b>Number and type of assessment(s)</b>                    | <b><i>N</i></b> |
|------------------------------------------------------------|-----------------|
| At least one preoperative assessment                       | 453             |
| Multiple preoperative assessments                          | 144             |
| At least one postoperative assessment                      | 361             |
| Multiple postoperative assessments                         | 116             |
| At least one preoperative and one postoperative assessment | 314             |

**Supplementary Table 3.** Demographic information and clinical characteristics ( $N = 500$ ).

|                                                                                    |                             |
|------------------------------------------------------------------------------------|-----------------------------|
| <b>Sex</b> $N$ (% of total sample)                                                 |                             |
| Males                                                                              | 252 (50)                    |
| Females                                                                            | 248 (50)                    |
| <b>Ethnicity</b> $N$ (% of total sample)                                           |                             |
| Asian                                                                              | 28 (6)                      |
| Black                                                                              | 22 (4)                      |
| Mixed                                                                              | 10 (2)                      |
| White                                                                              | 390 (78)                    |
| Other                                                                              | 7 (1)                       |
| Ethnicity not asked or given                                                       | 43 (9)                      |
| <b>Handedness</b> $N$ (% of total sample)                                          |                             |
| Right                                                                              | 348 (70)                    |
| Left                                                                               | 100 (20)                    |
| No clear hand preference/Ambidextrous                                              | 14 (3)                      |
| Missing data                                                                       | 38 (8)                      |
| <b>Educational status</b> $N$ (% of total sample)                                  |                             |
| Mainstream school                                                                  | 191 (38)                    |
| Mainstream school with support                                                     | 157 (31)                    |
| SEN school                                                                         | 59 (12)                     |
| Home-schooled/Residential home                                                     | 13 (3)                      |
| Not of school age                                                                  | 52 (10)                     |
| Missing data                                                                       | 28 (6)                      |
| <b>Epilepsy characteristics</b> years, Md [IQR] (range)                            |                             |
| Age at first seizure <sup>a</sup>                                                  | 3.0 [1.0, 6.0] (0-15.3)     |
| Age of epilepsy onset                                                              | 3.2 [1.2, 6.5] (0-15.3)     |
| Age at surgery <sup>b</sup>                                                        | 11.9 [7.8, 15.0] (0.2-19.5) |
| Duration of epilepsy at time of surgery                                            | 6.1 [3.9, 9.6] (0.1-18.4)   |
| <b>Antiseizure medication (ASM)</b> $N$ (% of total sample)                        |                             |
| <b>Number of ASMs at preoperative evaluation</b>                                   |                             |
| 0                                                                                  | 6 (1)                       |
| 1                                                                                  | 111 (22)                    |
| 2                                                                                  | 208 (42)                    |
| 3                                                                                  | 124 (25)                    |
| 4+                                                                                 | 40 (8)                      |
| Missing data                                                                       | 11 (2)                      |
| <b>Total number of ASMs trialled (from epilepsy onset to surgery) <sup>c</sup></b> |                             |
| 0                                                                                  | 1 (<1)                      |
| 1-2                                                                                | 82 (16)                     |
| 3-4                                                                                | 176 (35)                    |

|              |          |
|--------------|----------|
| 5-6          | 126 (25) |
| 7-8          | 61 (12)  |
| 9+           | 31 (6)   |
| Missing data | 23 (5)   |

---

**Preoperative MRI findings** *N* (% of total sample)

---

**MRI laterality**

---

|                |          |
|----------------|----------|
| Left           | 240 (48) |
| Right          | 202 (40) |
| Bilateral      | 38 (8)   |
| Negative       | 18 (4)   |
| Not applicable | 1 (<1)   |
| Missing data   | 1 (<1)   |

---

**MRI status**

---

|              |          |
|--------------|----------|
| Focal        | 324 (65) |
| Diffuse      | 117 (23) |
| Multifocal   | 40 (8)   |
| Negative     | 18 (4)   |
| Missing data | 1 (<1)   |

---

**Genetic findings** *N* (% of total sample)

---

|                                  |          |
|----------------------------------|----------|
| Pathogenic/likely pathogenic SNV | 11 (2)   |
| CNV                              | 2 (<1)   |
| Benign/likely benign SNV         | 10 (2)   |
| No variant identified            | 34 (7)   |
| No test administered             | 443 (89) |

---

**Surgery information** *N* (% of total sample)

---

**Type of surgery**

---

|                           |          |
|---------------------------|----------|
| Lesionectomy              | 208 (42) |
| Lobectomy                 | 174 (35) |
| Hemispherotomy            | 80 (16)  |
| Disconnection             | 16 (3)   |
| Corpus callosotomy        | 11 (2)   |
| Lobectomy + Disconnection | 7 (1)    |
| Lesionectomy + Lobectomy  | 4 (<1)   |

---

**Side operated on**

---

|                             |          |
|-----------------------------|----------|
| Left                        | 227 (45) |
| Right                       | 261 (52) |
| Not applicable <sup>d</sup> | 12 (2)   |

---

**Lobe operated on**

---

|            |          |
|------------|----------|
| Temporal   | 236 (47) |
| Frontal    | 90 (18)  |
| Multilobar | 37 (7)   |
| Parietal   | 33 (7)   |
| Occipital  | 10 (2)   |

|                                                      |          |
|------------------------------------------------------|----------|
| Insular                                              | 2 (<1)   |
| Not applicable <sup>e</sup>                          | 92 (18)  |
| <b>Histopathology diagnosis</b>                      |          |
| LEAT                                                 | 126 (25) |
| MTS                                                  | 75 (15)  |
| FCD-II                                               | 71 (14)  |
| Scarring                                             | 40 (8)   |
| NSC                                                  | 35 (7)   |
| MCD-Other                                            | 25 (5)   |
| Rasmussen encephalitis                               | 23 (5)   |
| Vascular                                             | 18 (4)   |
| Tuberous sclerosis                                   | 11 (2)   |
| N-LEAT                                               | 8 (2)    |
| Normal result                                        | 7 (1)    |
| FCD-NOS                                              | 6 (1)    |
| M-MCD                                                | 2 (<1)   |
| Histopathology not collected or report not available | 53 (11)  |

Abbreviations: ASM = antiseizure medication; CNV = copy number variation; DNET = dysembryoplastic neuroepithelial tumour; FCD-II = focal cortical dysplasia type-II; FCD-NOS = focal cortical dysplasia not otherwise specified; IQR = interquartile range; LEAT = low-grade epilepsy-associated tumour; MCD-Other = malformation of cortical development-other; Md = median; M-MCD = mild malformation of cortical development; MTS = mesial temporal sclerosis; NA = not applicable; N-LEAT = non-low-grade epilepsy-associated tumour; NSC = non-specific epilepsy-associated changes; SD = standard deviation; SEN = special educational needs; SNV = single nucleotide variation.

<sup>a</sup> Age at first seizure and Age of epilepsy onset were kept distinct to account for early, isolated occurrences of febrile seizures.

<sup>b</sup> Three patients were 19 years of age at time of surgery.

<sup>c</sup> One patient had not been trialled on any ASMs prior to surgery due to parental preference. A small proportion of patients ( $N = 32$  patients; 6% of the cohort) had been trialled on one ASM prior to surgery; however, they all had a clearly defined lesion on their preoperative MRI scan and the clinical team recommended they proceed to surgery due to the high likelihood of drug-resistance.

<sup>d</sup> Not applicable was assigned to focal resections that involved the removal of a hypothalamic hamartoma.

<sup>e</sup> Not applicable was assigned to hemispherotomy as well as focal resections that involved the removal of a hypothalamic hamartoma.

**Supplementary Table 4.** Past and current seizure information ( $N = 500$ ).

| <b>Family history of epilepsy</b> $N$ (% of total sample)                  |          |
|----------------------------------------------------------------------------|----------|
| Yes                                                                        | 144 (29) |
| No                                                                         | 322 (64) |
| Missing data                                                               | 34 (7)   |
| <b>Seizure history</b> $N$ (% of total sample)                             |          |
| <b>History of infantile spasms</b>                                         |          |
| Yes                                                                        | 33 (7)   |
| No                                                                         | 417 (83) |
| Missing data                                                               | 50 (10)  |
| <b>History of status epilepticus</b>                                       |          |
| EPC                                                                        | 17 (3)   |
| Non-convulsive                                                             | 7 (1)    |
| Convulsive                                                                 | 63 (13)  |
| Mixed                                                                      | 6 (1)    |
| None                                                                       | 358 (72) |
| Missing data                                                               | 49 (10)  |
| <b>History of generalised tonic-clonic seizures</b>                        |          |
| Yes                                                                        | 205 (41) |
| No                                                                         | 241 (48) |
| Missing data                                                               | 54 (11)  |
| <b>Seizures at time of preoperative evaluation</b> $N$ (% of total sample) |          |
| <b>Spasms</b>                                                              |          |
| Yes                                                                        | 37 (7)   |
| No                                                                         | 416 (83) |
| Missing data                                                               | 47 (9)   |
| <b>Number of seizure types</b>                                             |          |
| 0                                                                          | 5 (1)    |
| 1                                                                          | 219 (44) |
| 2                                                                          | 154 (31) |
| 3                                                                          | 50 (10)  |
| 4                                                                          | 16 (3)   |
| 5                                                                          | 1 (<1)   |
| 6                                                                          | 2 (<1)   |
| Missing data                                                               | 53 (11)  |

Abbreviations: EPC = epilepsia partialis continua.

**Supplementary Table 5.** Comparison between cohorts with a single versus multiple preoperative assessments, a single versus multiple postoperative assessments, as well as surgical patients with and without neuropsychology assessment.

|                               | <b>One versus multiple preoperative assessments</b>                                                                                                                                                        | <b>One versus multiple postoperative assessments</b> | <b>Surgical cohort with versus without neuropsychological assessment</b>                                                                                                                                                                                                          |
|-------------------------------|------------------------------------------------------------------------------------------------------------------------------------------------------------------------------------------------------------|------------------------------------------------------|-----------------------------------------------------------------------------------------------------------------------------------------------------------------------------------------------------------------------------------------------------------------------------------|
| Sex                           | ns                                                                                                                                                                                                         | ns                                                   | ns                                                                                                                                                                                                                                                                                |
| Handedness                    | ns                                                                                                                                                                                                         | ns                                                   | ***<br>The surgery cohort without neuropsychology was more likely to have no hand preference or be left-handed                                                                                                                                                                    |
| Educational status            | ns                                                                                                                                                                                                         | ns                                                   | ***<br>The surgery cohort without neuropsychology was more likely to not be of school age or attend a special educational needs school                                                                                                                                            |
| Preoperative FSIQ             | ns                                                                                                                                                                                                         | ns                                                   | -                                                                                                                                                                                                                                                                                 |
| Family history of epilepsy    | ns                                                                                                                                                                                                         | ns                                                   | ns                                                                                                                                                                                                                                                                                |
| Genetic diagnosis of epilepsy | ns                                                                                                                                                                                                         | ns                                                   | ***<br>The surgery cohort without neuropsychology was more likely to have a genetic diagnosis of epilepsy                                                                                                                                                                         |
| Age of epilepsy onset         | ns                                                                                                                                                                                                         | ns                                                   | ***<br>The surgery cohort without neuropsychology had a younger age of epilepsy onset; $Md_{\text{surgery only}} = 0.4$ , $IQR_{\text{surgery only}} = (0.1, 1.2)$ versus $Md_{\text{surgery \& neuropsychology}} = 3.2$ , $IQR_{\text{surgery \& neuropsychology}} = (1.4, 6.5)$ |
| Age at surgery                | **<br>Patients with one assessment had a younger age at surgery; $Md_{\text{single}} = 11.8$ , $IQR_{\text{single}} = (7.9, 15.0)$ versus $Md_{\text{multi}} = 13.4$ , $IQR_{\text{multi}} = (10.4, 15.6)$ | ns                                                   | ***<br>The surgery cohort without neuropsychology had a younger age at surgery; $Md_{\text{surgery only}} = 5.3$ , $IQR_{\text{surgery only}} = (2.4, 8.9)$ versus $Md_{\text{surgery \& neuropsychology}} = 11.9$ , $IQR_{\text{surgery \& neuropsychology}} = (7.8, 15.0)$      |
| Duration of epilepsy          | **<br>Patients with one assessment had                                                                                                                                                                     | ns                                                   | ***<br>The surgery cohort without neuropsychology had                                                                                                                                                                                                                             |

|                                                                              |                                                                                                                                                                                                                                            |    |                                                                                                                                                                                                                                                                                                                            |
|------------------------------------------------------------------------------|--------------------------------------------------------------------------------------------------------------------------------------------------------------------------------------------------------------------------------------------|----|----------------------------------------------------------------------------------------------------------------------------------------------------------------------------------------------------------------------------------------------------------------------------------------------------------------------------|
|                                                                              | shorter duration of epilepsy;<br>Md <sub>single</sub> = 6.0,<br>IQR <sub>single</sub> = (3.9, 9.7)<br>versus Md <sub>multi</sub> = 8.2,<br>IQR <sub>multi</sub> = (5.3, 10.8)                                                              |    | shorter duration of epilepsy;<br>Md <sub>surgery only</sub> = 3.7, IQR <sub>surgery only</sub> = (1.9, 6.8) versus<br>Md <sub>surgery &amp; neuropsychology</sub> = 6.3,<br>IQR <sub>surgery &amp; neuropsychology</sub> = (3.9, 9.8)                                                                                      |
| History of infantile spasms                                                  | ns                                                                                                                                                                                                                                         | ns | ***<br>The surgery cohort without neuropsychology was more likely to have a history of infantile spasms                                                                                                                                                                                                                    |
| Spasms at time of preoperative evaluation                                    | ns                                                                                                                                                                                                                                         | ns | ***<br>The surgery cohort without neuropsychology was more likely to have spasms at the time of preoperative evaluation                                                                                                                                                                                                    |
| History of GTC seizures                                                      | ns                                                                                                                                                                                                                                         | ns | ns                                                                                                                                                                                                                                                                                                                         |
| Number of seizure types at preoperative assessment                           | ns                                                                                                                                                                                                                                         | ns | ns                                                                                                                                                                                                                                                                                                                         |
| Number of ASMs at preoperative assessment                                    | ns                                                                                                                                                                                                                                         | ns | ***<br>The surgery cohort without neuropsychology was receiving a greater number of different ASMs at the time of preoperative evaluation; M <sub>surgery only</sub> = 2.6, SD <sub>surgery only</sub> = 1.0 versus<br>M <sub>surgery &amp; neuropsychology</sub> = 2.2, SD <sub>surgery &amp; neuropsychology</sub> = 1.0 |
| Total number of ASMs trialled from epilepsy onset to preoperative evaluation | ***<br>Patients with one assessment had trialled a smaller number of different ASMs over the course of their epilepsy;<br>M <sub>single</sub> = 4.4, SD <sub>single</sub> = 2.1 versus M <sub>multi</sub> = 5.5, SD <sub>multi</sub> = 2.6 | ns | ***<br>The surgery cohort without neuropsychology had trialled a larger number of different ASMs over the course of their epilepsy;<br>M <sub>surgery only</sub> = 5.4, SD <sub>surgery only</sub> = 2.6 versus<br>M <sub>neuropsychology</sub> = 4.6, SD <sub>neuropsychology</sub> = 2.4                                 |
| MRI laterality                                                               | ns                                                                                                                                                                                                                                         | ns | ***<br>The surgery cohort without neuropsychology was more likely to have bilateral MRI abnormalities or be MRI negative                                                                                                                                                                                                   |



|                          |                                                                                                                                            |    |                                                                                                                                                  |
|--------------------------|--------------------------------------------------------------------------------------------------------------------------------------------|----|--------------------------------------------------------------------------------------------------------------------------------------------------|
| Type of MRI abnormality  | *<br>Patients who had multiple assessments were more likely to have non-focal (diffuse or multifocal) MRI abnormalities or be MRI negative | ns | ***<br>The surgery cohort without neuropsychology was more likely to have non-focal (diffuse or multifocal) MRI abnormalities or be MRI negative |
| Procedure type           | ns                                                                                                                                         | ns | ***<br>The surgery cohort without neuropsychology was more likely to have undergone corpus callosotomy or hemispherotomy                         |
| Side operated on         | ns                                                                                                                                         | ns | ns                                                                                                                                               |
| Lobe operated on         | ns                                                                                                                                         | ns | ***<br>The surgery cohort without neuropsychology was more likely to have undergone corpus callosotomy, hemispherotomy or multilobar surgery     |
| Histopathology           | ns                                                                                                                                         | ns | ***<br>The surgery cohort without neuropsychology was more likely to have a diagnosis of MCD-Other, FCD-II, and Scarring                         |
| Seizure outcome          | ns                                                                                                                                         | ns | ***<br>The surgery cohort without neuropsychology was more likely to not be seizure-free                                                         |
| Postoperative ASM status | ns                                                                                                                                         | ns | ns                                                                                                                                               |

p-values were obtained following correction for multiple comparison using the Holm method, which was applied sequentially to each column.

Abbreviations: ASM = antiseizure medication; FCD-II = focal cortical dysplasia type II; FSIQ = Full-Scale IQ; GTC = generalised tonic-clonic seizures; IQR = interquartile range; M = mean; Md = median; MCD-Other = malformation of cortical development-other; ns = not significant; SD = standard deviation.

\*p <0.05

\*\*p <0.01

\*\*\*p <0.001

**Supplementary Table 6.** Mixed-effects linear regression analyses: preoperative neuropsychological changes in Rasmussen encephalitis versus non-progressive aetiologies.

| <b>Model</b>                                             | <b><math>\beta</math></b> | <b>SE</b> | <b>p</b>   |
|----------------------------------------------------------|---------------------------|-----------|------------|
| <b>FSIQ</b>                                              |                           |           |            |
| Duration of epilepsy                                     | -1.9                      | 0.3       | <0.001 *** |
| Aetiology: Rasmussen encephalitis                        | -7.9                      | 5.7       | 0.166      |
| Duration of epilepsy * Aetiology: Rasmussen encephalitis | -2.7                      | 1.1       | 0.020 *    |
| <b>Verbal IQ</b>                                         |                           |           |            |
| Duration of epilepsy                                     | -1.6                      | 0.2       | <0.001 *** |
| Aetiology: Rasmussen encephalitis                        | -8.9                      | 4.9       | 0.070      |
| Duration of epilepsy * Aetiology: Rasmussen encephalitis | -1.3                      | 1.0       | 0.193      |
| <b>Performance IQ</b>                                    |                           |           |            |
| Duration of epilepsy                                     | -1.1                      | 0.2       | <0.001 *** |
| Aetiology: Rasmussen encephalitis                        | -8.1                      | 5.4       | 0.138      |
| Duration of epilepsy * Aetiology: Rasmussen encephalitis | -1.7                      | 1.2       | 0.153      |
| <b>Working Memory</b>                                    |                           |           |            |
| Duration of epilepsy                                     | -0.8                      | 0.3       | 0.001 **   |
| Aetiology: Rasmussen encephalitis                        | -11.9                     | 6.8       | 0.080      |
| Duration of epilepsy * Aetiology: Rasmussen encephalitis | -0.3                      | 1.5       | 0.827      |
| <b>Processing Speed</b>                                  |                           |           |            |
| Duration of epilepsy                                     | -1.4                      | 0.2       | <0.001 *** |
| Aetiology: Rasmussen encephalitis                        | -0.2                      | 6.1       | 0.975      |
| Duration of epilepsy * Aetiology: Rasmussen encephalitis | -3.4                      | 1.4       | 0.017 *    |
| <b>Reading</b>                                           |                           |           |            |
| Duration of epilepsy                                     | -1.0                      | 0.2       | <0.001 *** |
| Aetiology: Rasmussen encephalitis                        | 0.8                       | 6.3       | 0.904      |
| Duration of epilepsy * Aetiology: Rasmussen encephalitis | -1.9                      | 1.3       | 0.141      |
| <b>Spelling</b>                                          |                           |           |            |
| Duration of epilepsy                                     | -0.9                      | 0.2       | <0.001 *** |
| Aetiology: Rasmussen encephalitis                        | -2.9                      | 6.4       | 0.655      |
| Duration of epilepsy * Aetiology: Rasmussen encephalitis | -0.4                      | 1.3       | 0.759      |
| <b>Numeracy</b>                                          |                           |           |            |
| Duration of epilepsy                                     | -1.6                      | 0.3       | <0.001 *** |
| Aetiology: Rasmussen encephalitis                        | -16.1                     | 6.7       | 0.017 *    |
| Duration of epilepsy * Aetiology: Rasmussen encephalitis | 1.3                       | 1.4       | 0.367      |

Abbreviations: FSIQ = Full-Scale IQ; SE = standard error.

\*p <0.05

\*\*p <0.01

\*\*\*p <0.001

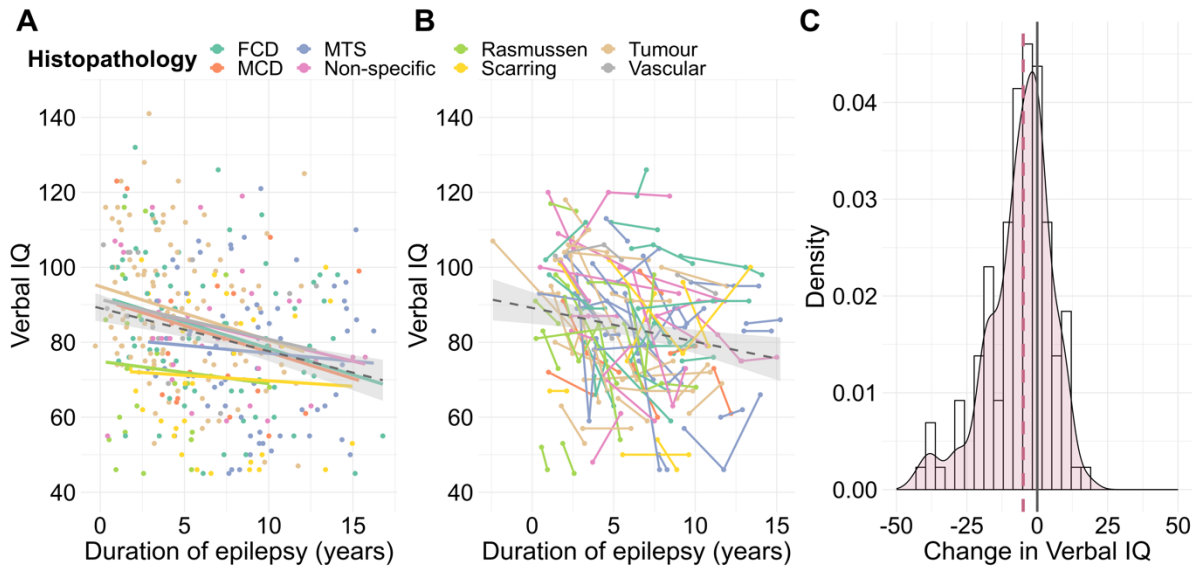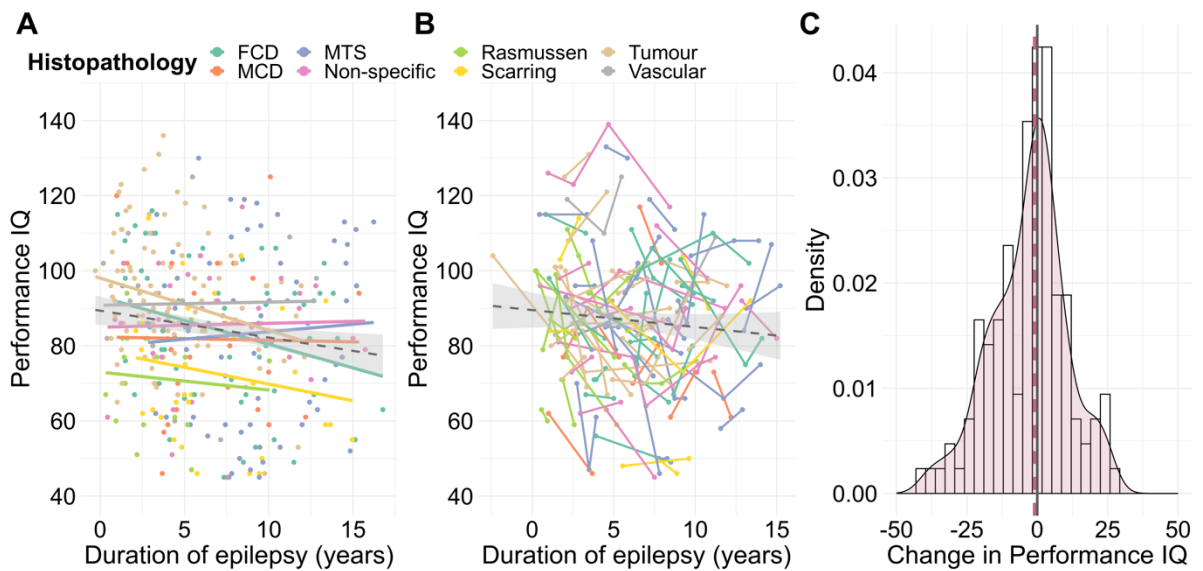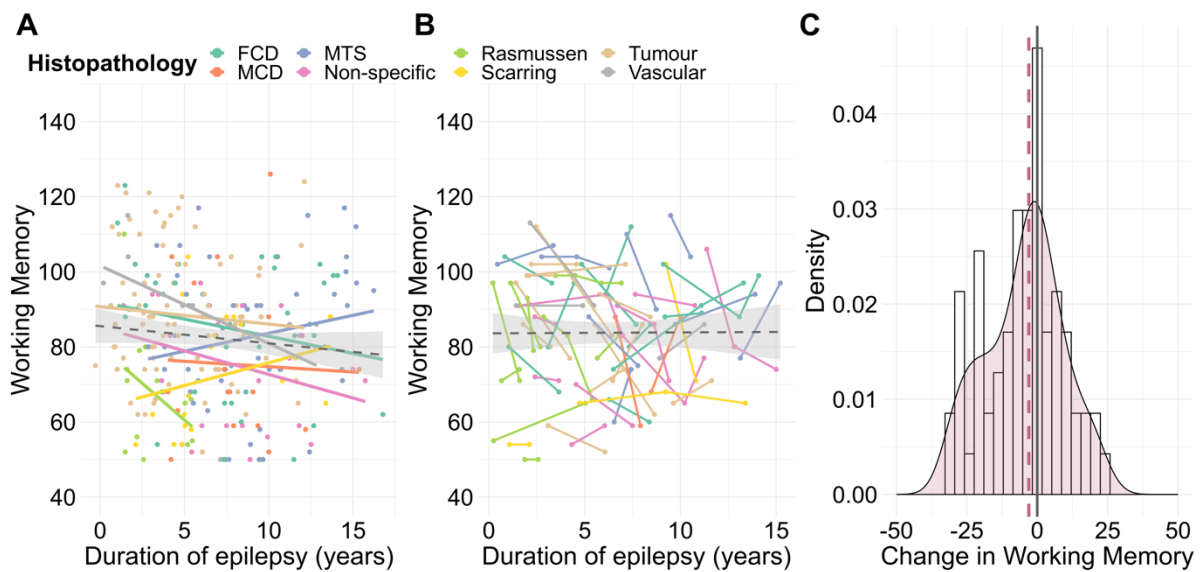

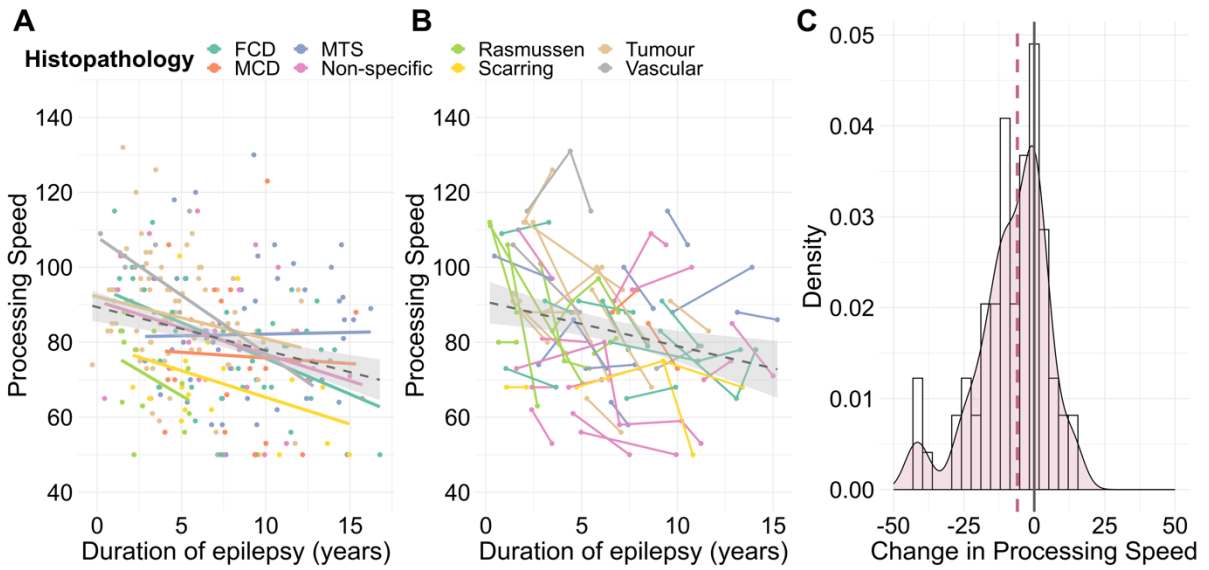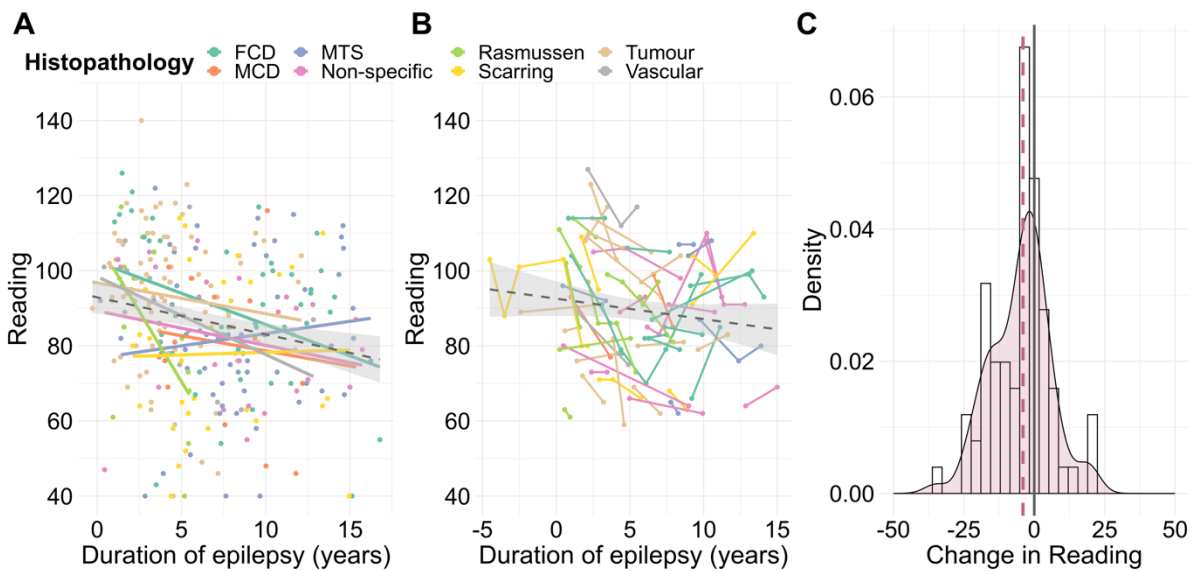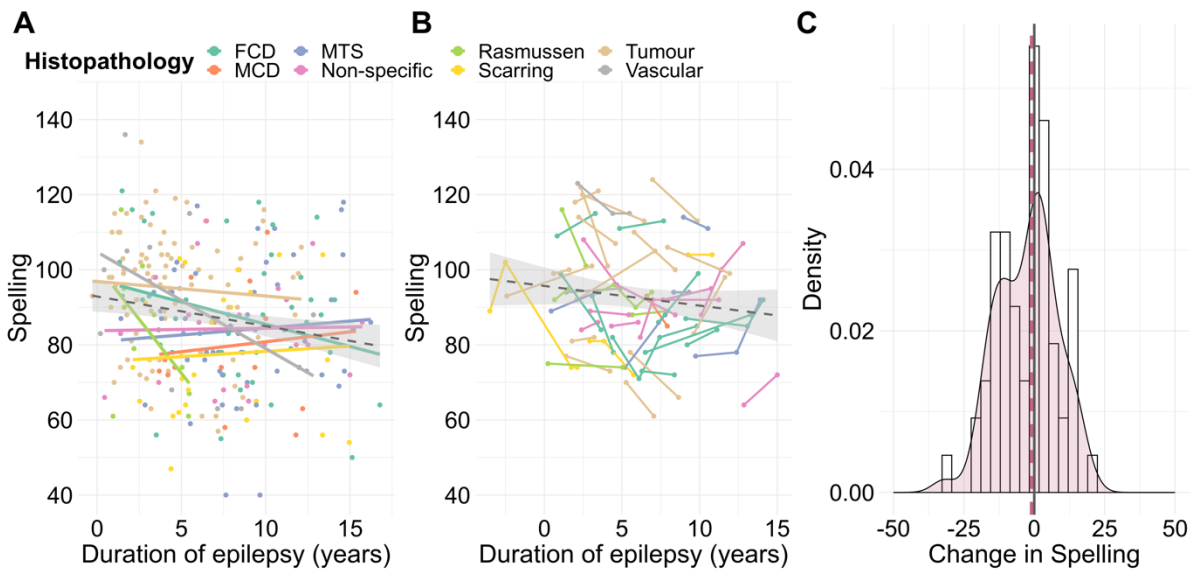

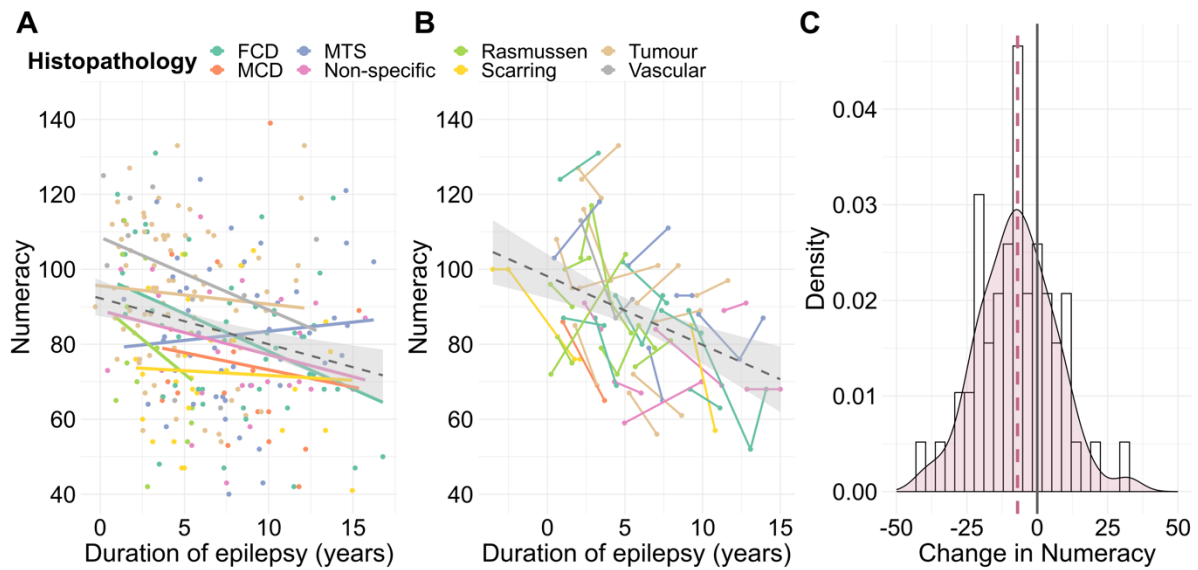

**Supplementary Fig. 1. Preoperative changes in neuropsychological performance (A)** Cross-sectional preoperative trajectories in Verbal IQ, Performance IQ, Working Memory, Processing Speed, Reading, Spelling, and Numeracy across different aetiologies. A single preoperative assessment was included for each patient. If patients had more than one preoperative assessment, the assessment closest to surgery was chosen. Linear modelling was fitted to all data points (dotted lines); shaded areas represent the 95% confidence intervals. **(B)** Longitudinal preoperative trajectories in Verbal IQ, Performance IQ, Working Memory, Processing Speed, Reading, Spelling, and Numeracy across different aetiologies. Only patients with two or more preoperative assessments were included in the visualisation. All preoperative assessments were included for each patient. Linear modelling was fitted to all data points (dotted lines); shaded areas represent the 95% confidence intervals. **(C)** Individual change in preoperative Verbal IQ, Performance IQ, Working Memory, Processing Speed, Reading, Spelling, and Numeracy. The distribution of change scores is represented using a density plot. The change score for each patient was computed by subtracting the patient's first preoperative score from their last preoperative score. The median change score is displayed with a dashed purple line. Only patients with two or more preoperative assessments were included in the visualisation (patients with unknown histopathology result were also included). Abbreviations: FCD = focal cortical dysplasia; MCD = malformation of cortical development; MTS = mesial temporal sclerosis.

**A**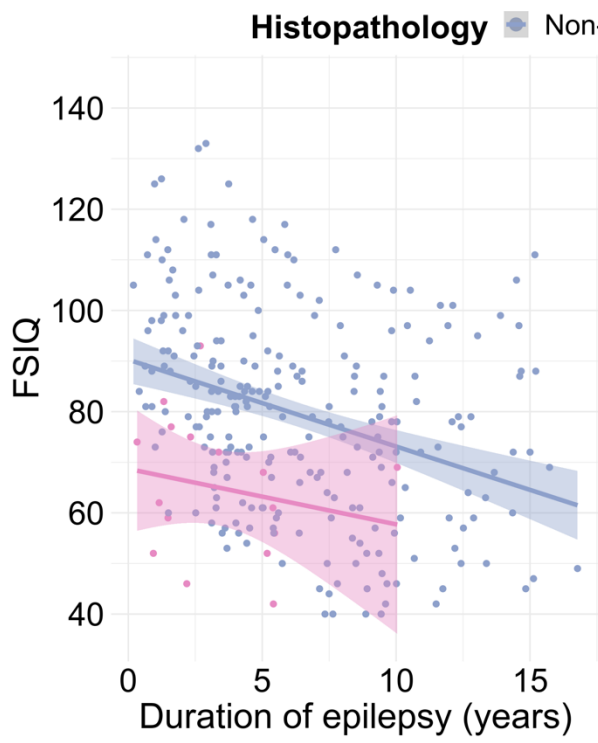**B**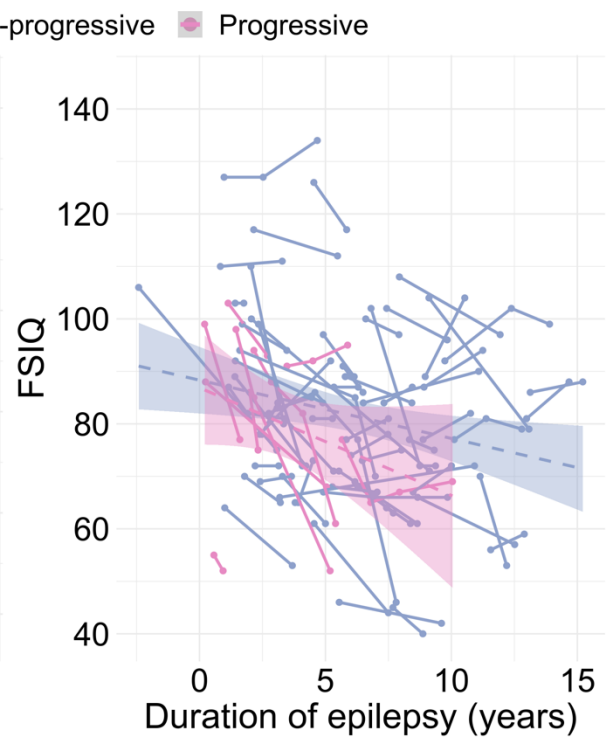**A**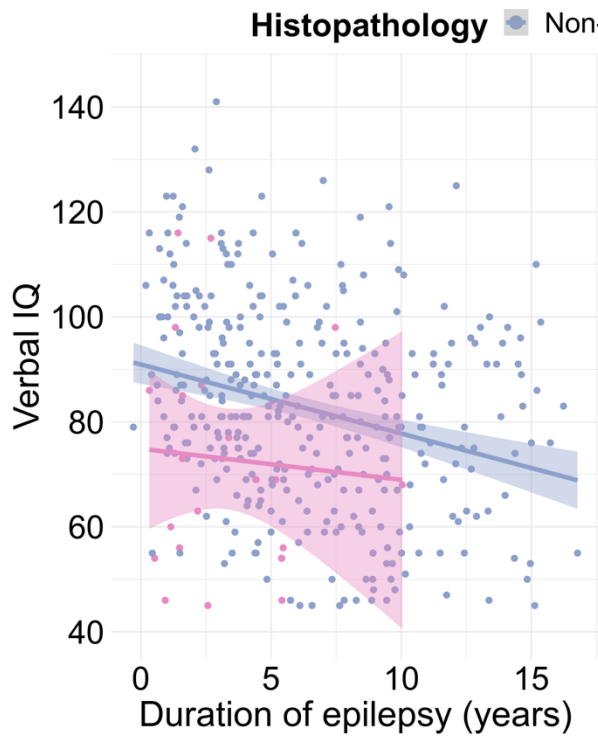**B**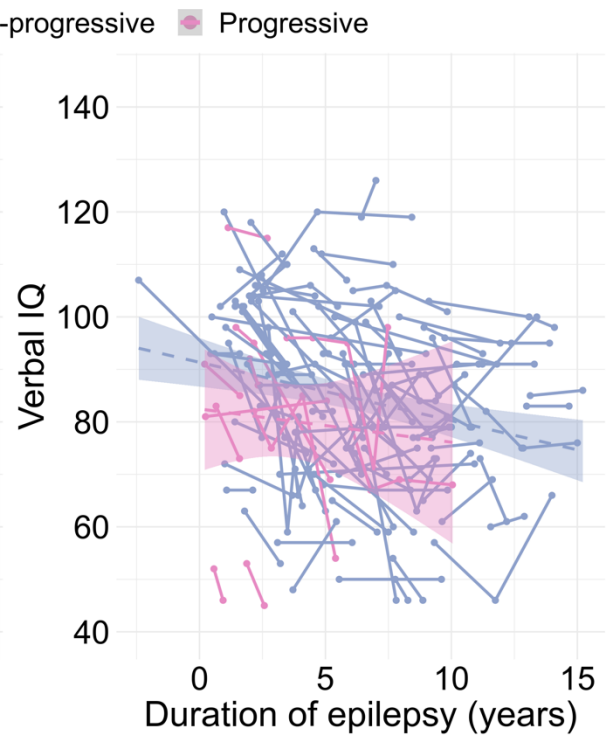

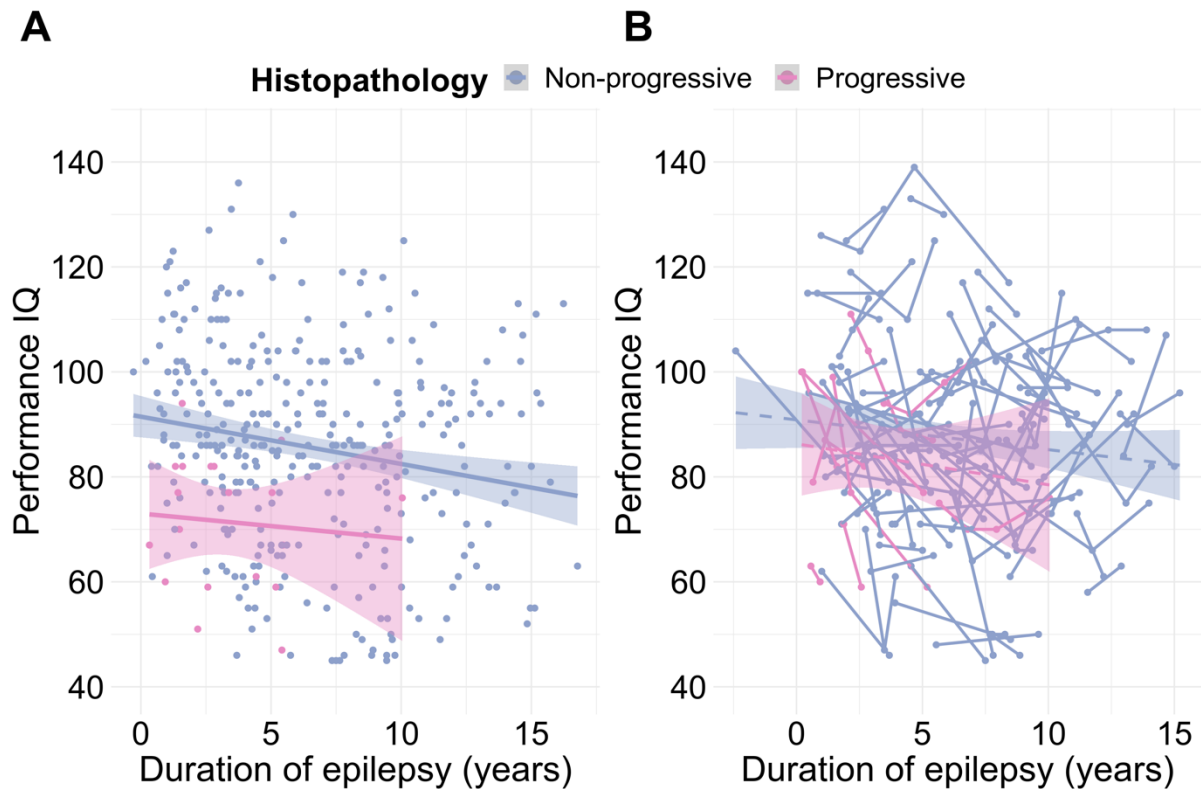

**Supplementary Fig. 2. Preoperative changes in neuropsychological performance in progressive versus non-progressive aetiologies (A)** Cross-sectional preoperative trajectories in FSIQ, Verbal IQ, and Performance IQ in Rasmussen encephalitis (pink) versus non-progressive aetiologies (blue). A single preoperative assessment was included for each patient. If patients had more than one preoperative assessment, the assessment closest to surgery was chosen. Linear modelling was fitted to all data points, according to aetiology (solid pink lines for Rasmussen encephalitis and solid blue lines for non-progressive aetiologies); shaded areas represent the 95% confidence intervals. **(B)** Longitudinal preoperative trajectories in FSIQ, Verbal IQ, and Performance IQ in Rasmussen encephalitis (pink) versus non-progressive aetiologies (blue). Only patients with two or more preoperative assessments were included in the visualisation. All preoperative assessments were included for each patient. Linear modelling was fitted to all data points, according to aetiology (dotted pink lines for Rasmussen encephalitis and dotted blue lines for non-progressive aetiologies); shaded areas represent the 95% confidence intervals. Working Memory, Processing Speed, Reading, Spelling, and Numeracy were excluded due to small *N*. Abbreviations: FSIQ = Full-Scale IQ.

**Supplementary Table 7.** Change in preoperative neuropsychological performance, from first to last preoperative assessment.

|                            | First pre-operative assessment |                                               |                                                |                         | Last pre-operative assessment |                                               |                                                |                         | Change score, Md [IQR] (range) | p        | Improved N (%) | Stable N (%) | Declined N (%) | Yearly change, M [SD] (range) |
|----------------------------|--------------------------------|-----------------------------------------------|------------------------------------------------|-------------------------|-------------------------------|-----------------------------------------------|------------------------------------------------|-------------------------|--------------------------------|----------|----------------|--------------|----------------|-------------------------------|
|                            | Age, years, Md [IQR] (range)   | Duration of epilepsy, years, Md [IQR] (range) | Time prior to surgery, years, Md [IQR] (range) | Score, Md [IQR] (range) | Age, years, Md [IQR] (range)  | Duration of epilepsy, years, Md [IQR] (range) | Time prior to surgery, years, Md [IQR] (range) | Score, Md [IQR] (range) |                                |          |                |              |                |                               |
| <b>IQ domains</b>          |                                |                                               |                                                |                         |                               |                                               |                                                |                         |                                |          |                |              |                |                               |
| FSIQ<br>N = 84             | 9.2 [7.0, 11.8] (3.5, 16.3)    | 4.6 [2.0, 6.6] (-2.0, 13.1)                   | 2.9 [2.1, 5.0] (0.6, 10.3)                     | 83 [69, 95] (45, 127)   | 12.4 [9.0, 14.5] (4.4, 18.2)  | 7.0 [4.5, 9.7] (0.9, 15.2)                    | 0.9 [0.5, 1.4] (0.0, 5.2)                      | 75 [64, 87] (40, 134)   | -5 [-11, 2] (-46, 15)          | 0.021 *  | 3 (4%)         | 56 (67%)     | 25 (30%)       | -3 [7] (-33, 11)              |
| Verbal IQ<br>N = 126       | 9.2 [6.9, 11.5] (3.9, 16.3)    | 4.0 [2.0, 6.6] (-2.4, 13.1)                   | 3.1 [2.2, 5.2] (0.6, 10.4)                     | 87 [74, 99] (48, 120)   | 12.4 [9.7, 14.6] (5.1, 18.2)  | 7.2 [4.5, 9.8] (0.9, 15.2)                    | 0.9 [0.6, 1.4] (0.0, 4.0)                      | 79 [67, 91] (45, 126)   | -5 [-12, 1] (-43, 18)          | 0.003 ** | 7 (6%)         | 81 (64%)     | 38 (30%)       | -3 [6] (-23, 12)              |
| Performance IQ<br>N = 123  | 9.3 [7.1, 11.5] (3.9, 16.3)    | 4.5 [2.0, 6.6] (-2.4, 13.1)                   | 3.1 [2.2, 5.3] (0.6, 10.4)                     | 86 [73, 100] (46, 133)  | 12.5 [9.9, 14.6] (5.1, 18.2)  | 7.4 [4.6, 9.9] (0.9, 15.7)                    | 0.9 [0.6, 1.4] (0.0, 4.0)                      | 84 [71, 96] (45, 131)   | -1 [-12, 4] (-40, 26)          | 0.209    | 18 (15%)       | 68 (55%)     | 37 (30%)       | -1 [8] (-24, 33)              |
| Working Memory<br>N = 68   | 9.8 [8.8, 12.9] (5.5, 16.3)    | 4.4 [2.0, 6.8] (0.1, 13.1)                    | 3.2 [2.2, 4.8] (1.0, 10.4)                     | 86 [72, 97] (50, 115)   | 13.1 [11.4, 15.3] (5.8, 11.4) | 7.2 [4.5, 9.6] (1.6, 15.2)                    | 1.0 [0.6, 1.5] (0.0, 3.5)                      | 80 [68, 91] (50, 112)   | -3 [-14, 5] (-31, 23)          | 0.091    | 9 (13%)        | 37 (54%)     | 22 (32%)       | -2 [9] (-43, 16)              |
| Processing Speed<br>N = 71 | 9.8 [8.6, 12.5] (5.2, 16.3)    | 4.3 [1.9, 7.0] (0.1, 13.1)                    | 3.3 [2.3, 4.8] (0.8, 10.4)                     | 88 [73, 97] (50, 117)   | 13.0 [11.3, 15.2] (6.0, 17.4) | 7.1 [4.5, 9.9] (1.6, 15.2)                    | 1.0 [0.6, 1.6] (0.0, 3.5)                      | 78 [69, 88] (49, 126)   | -6 [-14, 0] (-43, 15)          | 0.007 ** | 4 (6%)         | 40 (56%)     | 27 (38%)       | -4 [6] (-28, 9)               |
| <b>Academic attainment</b> |                                |                                               |                                                |                         |                               |                                               |                                                |                         |                                |          |                |              |                |                               |
| Reading<br>N = 73          | 9.3 [7.8, 11.2] (4.0, 15.4)    | 3.9 [2.0, 6.6] (-4.5, 12.9)                   | 3.9 [2.5, 5.5] (0.6, 10.5)                     | 91 [79, 104] (40, 127)  | 12.5 [10.8, 14.6] (5.9, 16.9) | 7.2 [4.4, 9.8] (0.9, 15.7)                    | 1.1 [0.7, 1.5] (0.0, 5.4)                      | 85 [73, 98] (40, 117)   | -4 [-13, 1] (-35, 20)          | 0.130    | 4 (5%)         | 46 (63%)     | 23 (32%)       | -2 [6] (-32, 10)              |
| Spelling<br>N = 63         | 9.7 [8.1, 11.3] (4.0, 15.4)    | 4.3 [2.1, 6.6] (0.1, 13.1)                    | 3.9 [2.6, 5.4] (0.8, 10.4)                     | 89 [81, 100] (40, 127)  | 13.1 [11.4, 14.8] (6.0, 17.4) | 7.2 [4.5, 9.9] (1.6, 15.2)                    | 1.0 [0.7, 1.4] (0.0, 3.5)                      | 92 [77, 100] (49, 126)  | -1 [-11, 4] (-32, 19)          | 0.790    | 9 (14%)        | 37 (59%)     | 17 (27%)       | -1 [5] (-23, 9)               |



|                           |                    |                   |                   |                          |                      |                   |                   |                          |                          |         |         |          |          |                     |
|---------------------------|--------------------|-------------------|-------------------|--------------------------|----------------------|-------------------|-------------------|--------------------------|--------------------------|---------|---------|----------|----------|---------------------|
|                           | (5.4, 15.4)        | (-3.5, 12.9)      | (1.0, 10.5)       | (47, 125)                | (8.0, 16.8)          | (1.6, 15.7)       | (0.0, 5.4)        | (44, 121)                |                          |         |         |          |          |                     |
| Numeracy<br><i>N</i> = 56 | 9.6 [8.1,<br>12.1] | 4.1 [1.9,<br>6.5] | 3.3 [2.5,<br>5.0] | 89 [75, 98]<br>(53, 127) | 12.4 [11.2,<br>14.7] | 7.1 [3.7,<br>9.4] | 1.0 [0.6,<br>1.7] | 80 [65, 92]<br>(42, 133) | -7 [-16, 1]<br>(-40, 32) | 0.039 * | 6 (11%) | 26 (46%) | 24 (43%) | -4 [6]<br>(-23, 12) |

Abbreviations: IQR = interquartile range; M = mean; Md = median.

\**p* < 0.05

\*\**p* < 0.01

\*\*\**p* < 0.001

**Supplementary Table 8.** Neuropsychology performance at the time of presurgical evaluation.

|                                    | <b>Score, Md</b><br>[IQR] (range) | <b>&lt;70</b><br><i>N</i> (%) | <b>70-85</b><br><i>N</i> (%) | <b>85-115</b><br><i>N</i> (%) | <b>&gt;115</b><br><i>N</i> (%) |
|------------------------------------|-----------------------------------|-------------------------------|------------------------------|-------------------------------|--------------------------------|
| <b>IQ domains</b>                  |                                   |                               |                              |                               |                                |
| FSIQ<br><i>N</i> = 308             | 75 [61, 89]<br>(40, 133)          | 115 (37%)                     | 89 (29%)                     | 94 (31%)                      | 10 (3%)                        |
| Verbal IQ<br><i>N</i> = 434        | 80 [67, 93]<br>(45, 141)          | 129 (30%)                     | 125 (29%)                    | 159 (37%)                     | 21 (5%)                        |
| Performance IQ<br><i>N</i> = 410   | 84 [67, 96]<br>(45, 136)          | 112 (27%)                     | 95 (23%)                     | 178 (43%)                     | 25 (6%)                        |
| Working Memory<br><i>N</i> = 303   | 80 [65, 94]<br>(50, 126)          | 96 (32%)                      | 71 (23%)                     | 121 (40%)                     | 15 (5%)                        |
| Processing Speed<br><i>N</i> = 307 | 80 [68, 94]<br>(49, 132)          | 88 (29%)                      | 96 (31%)                     | 112 (36%)                     | 11 (4%)                        |
| <b>Academic attainment</b>         |                                   |                               |                              |                               |                                |
| Reading<br><i>N</i> = 335          | 86 [71, 100]<br>(40, 140)         | 77 (23%)                      | 78 (23%)                     | 161 (48%)                     | 19 (6%)                        |
| Spelling<br><i>N</i> = 310         | 87 [73, 99]<br>(40, 136)          | 59 (19%)                      | 84 (27%)                     | 148 (48%)                     | 19 (6%)                        |
| Numeracy<br><i>N</i> = 310         | 82 [66, 97]<br>(40, 139)          | 103 (33%)                     | 68 (22%)                     | 118 (38%)                     | 21 (7%)                        |

Abbreviations: FSIQ = Full-Scale IQ; IQR = interquartile range; Md = median.

**Supplementary Table 9.** Change in neuropsychological functioning from pre- to postoperative assessment, using the last preoperative assessment and the first postoperative assessment.

|                                    | <b>Pre-<br/>operative<br/>assessment<br/>score, Md<br/>[IQR]<br/>(range)</b> | <b>Post-<br/>operative<br/>assessment<br/>score, Md<br/>(IQR)<br/>(range)</b> | <b>P</b> | <b>Improved<br/>N (%)</b> | <b>Stable<br/>N (%)</b> | <b>Declined<br/>N (%)</b> |
|------------------------------------|------------------------------------------------------------------------------|-------------------------------------------------------------------------------|----------|---------------------------|-------------------------|---------------------------|
| <b>IQ domains</b>                  |                                                                              |                                                                               |          |                           |                         |                           |
| FSIQ<br><i>N</i> = 157             | 78 [63, 95]<br>(40, 133)                                                     | 75 [64, 91]<br>(40, 130)                                                      | 0.768    | 24 (15%)                  | 111 (71%)               | 22 (14%)                  |
| Verbal IQ<br><i>N</i> = 286        | 81 [69, 95]<br>(45, 141)                                                     | 81 [69, 95]<br>(45, 130)                                                      | 0.331    | 32 (11%)                  | 201 (70%)               | 53 (19%)                  |
| Performance IQ<br><i>N</i> = 272   | 86 [72, 98]<br>(45, 136)                                                     | 86 [71, 100]<br>(40, 138)                                                     | 0.948    | 50 (18%)                  | 173 (64%)               | 49 (18%)                  |
| Working Memory<br><i>N</i> = 191   | 83 [68, 94]<br>(50, 126)                                                     | 84 [68, 97]<br>(50, 136)                                                      | 0.529    | 44 (23%)                  | 106 (55%)               | 41 (21%)                  |
| Processing Speed<br><i>N</i> = 188 | 83 [73, 94]<br>(50, 132)                                                     | 80 [70, 94]<br>(49, 137)                                                      | 0.515    | 37 (20%)                  | 108 (57%)               | 43 (23%)                  |
| <b>Academic attainment</b>         |                                                                              |                                                                               |          |                           |                         |                           |
| Reading<br><i>N</i> = 215          | 87 [75, 101]<br>(40, 140)                                                    | 86 [71, 98]<br>(40, 129)                                                      | 0.128    | 18 (8%)                   | 149 (69%)               | 48 (22%)                  |
| Spelling<br><i>N</i> = 192         | 88 [76, 100]<br>(40, 134)                                                    | 86 [74, 99]<br>(40, 128)                                                      | 0.465    | 21 (11%)                  | 133 (69%)               | 38 (20%)                  |
| Numeracy<br><i>N</i> = 189         | 84 [67, 101]<br>(42, 139)                                                    | 78 [62, 96]<br>(40, 143)                                                      | 0.152    | 33 (17%)                  | 103 (54%)               | 53 (28%)                  |

Only patients who had both pre- and postoperative assessment were included.

Abbreviations: FSIQ = Full-Scale IQ; IQR = interquartile range; Md = median.

**Supplementary Table 10.** Change in postoperative neuropsychological performance, from first to last postoperative assessment.

|                                   | First postoperative assessment   |                                                |                           | Last postoperative assessment    |                                                |                           | Change score, Md [IQR] (range) | p     |
|-----------------------------------|----------------------------------|------------------------------------------------|---------------------------|----------------------------------|------------------------------------------------|---------------------------|--------------------------------|-------|
|                                   | Age, years, Md [IQR] (range)     | Duration of follow-up, years, Md [IQR] (range) | Score, Md [IQR] (range)   | Age, years, Md [IQR] (range)     | Duration of follow-up, years, Md [IQR] (range) | Score, Md [IQR] (range)   |                                |       |
| <b>IQ domains</b>                 |                                  |                                                |                           |                                  |                                                |                           |                                |       |
| FSIQ<br><i>N</i> = 76             | 13.7 [10.1, 16.5]<br>(3.9, 20.5) | 1.3 [1.0, 1.6]<br>(0.0, 8.2)                   | 77 [62, 96]<br>(40, 127)  | 17.9 [14.9, 23.9]<br>(7.5, 32.9) | 7.0 [4.4, 10.1]<br>(1.9, 15.7)                 | 84 [62, 98]<br>(40, 139)  | 4 [-3, 11]<br>(-16, 22)        | 0.336 |
| Verbal IQ<br><i>N</i> = 104       | 12.9 [9.8, 16.3]<br>(3.9, 20.5)  | 1.2 [1.0, 1.5]<br>(0.0, 5.0)                   | 81 [69, 96]<br>(40, 126)  | 17.7 [14.5, 22.0]<br>(7.5, 32.9) | 6.0 [3.8, 9.4]<br>(1.3, 15.7)                  | 80 [70, 96]<br>(47, 138)  | 3 [-4, 12]<br>(-23, 28)        | 0.500 |
| Performance IQ<br><i>N</i> = 102  | 13.0 [10.0, 16.4]<br>(4.3, 20.5) | 1.2 [1.0, 1.6]<br>(0.0, 7.1)                   | 88 [67, 106]<br>(40, 138) | 17.9 [14.5, 22.1]<br>(7.5, 32.9) | 6.2 [3.9, 9.4]<br>(1.3, 15.7)                  | 92 [71, 104]<br>(45, 135) | 2 [-4, 12]<br>(-27, 36)        | 0.246 |
| Working Memory<br><i>N</i> = 84   | 13.0 [9.9, 16.4]<br>(6.4, 20.5)  | 1.3 [1.0, 2.0]<br>(0.2, 5.8)                   | 83 [68, 97]<br>(50, 124)  | 17.5 [14.5, 21.0]<br>(9.0, 32.9) | 5.9 [3.9, 9.2]<br>(1.3, 15.7)                  | 86 [69, 99]<br>(50, 126)  | 2 [-3, 9]<br>(-37, 25)         | 0.389 |
| Processing Speed<br><i>N</i> = 85 | 12.8 [9.4, 16.1]<br>(5.2, 21.4)  | 1.2 [1.0, 2.0]<br>(0.2, 7.1)                   | 81 [70, 94]<br>(50, 137)  | 17.2 [13.9, 20.6]<br>(7.5, 32.9) | 5.6 [3.8, 9.0]<br>(1.3, 15.7)                  | 84 [64, 97]<br>(49, 124)  | 0 [-6, 6]<br>(-45, 30)         | 0.854 |
| <b>Academic attainment</b>        |                                  |                                                |                           |                                  |                                                |                           |                                |       |
| Reading<br><i>N</i> = 89          | 12.8 [9.9, 16.4]<br>(5.2, 21.8)  | 1.2 [1.0, 2.0]<br>(0.0, 10.7)                  | 88 [71, 97]<br>(40, 143)  | 16.8 [14.2, 21.3]<br>(7.5, 31.8) | 5.9 [3.8, 9.4]<br>(1.3, 15.4)                  | 84 [69, 105]<br>(40, 125) | 0 [-8, 8]<br>(-46, 33)         | 0.947 |

|                           |                                 |                               |                           |                                  |                               |                           |                          |       |
|---------------------------|---------------------------------|-------------------------------|---------------------------|----------------------------------|-------------------------------|---------------------------|--------------------------|-------|
| Spelling<br><i>N</i> = 80 | 13.0 [9.9, 16.4]<br>(6.4, 21.8) | 1.2 [1.0, 2.0]<br>(0.0, 7.1)  | 87 [71, 100]<br>(42, 128) | 17.1 [14.5, 21.5]<br>(9.0, 31.8) | 6.2 [3.9, 9.4]<br>(1.3, 15.4) | 92 [69, 103]<br>(40, 130) | 2 [-4, 9]<br>(-63, 32)   | 0.506 |
| Numeracy<br><i>N</i> = 81 | 13.0 [9.9, 16.4]<br>(6.4, 21.8) | 1.3 [1.0, 2.3]<br>(0.0, 10.7) | 78 [66, 101]<br>(40, 139) | 16.9 [14.2, 21.3]<br>(9.0, 31.8) | 6.0 [3.9, 9.4]<br>(1.3, 15.4) | 78 [64, 95]<br>(40, 124)  | -5 [-15, 3]<br>(-34, 33) | 0.262 |

Abbreviations: FSIQ = Full-Scale IQ; IQR = interquartile range; Md = median.

**Supplementary Table 11.** Mixed-effects linear regression analyses: postoperative neuropsychological changes in seizure-free versus not seizure-free patients.

| <b>Model</b>                                          | <b><math>\beta</math></b> | <b>SE</b> | <b>p</b>   |
|-------------------------------------------------------|---------------------------|-----------|------------|
| <b>FSIQ</b>                                           |                           |           |            |
| Duration of follow-up                                 | 0.0                       | 0.3       | 0.928      |
| Seizure outcome: Seizure-free                         | 14.1                      | 2.9       | <0.001 *** |
| Duration of follow-up * Seizure outcome: Seizure-free | 0.9                       | 0.3       | 0.004 **   |
| <b>Verbal IQ</b>                                      |                           |           |            |
| Duration of follow-up                                 | -0.1                      | 0.3       | 0.625      |
| Seizure outcome: Seizure-free                         | 6.9                       | 2.3       | 0.003 **   |
| Duration of follow-up * Seizure outcome: Seizure-free | 1.0                       | 0.3       | 0.003 **   |
| <b>Performance IQ</b>                                 |                           |           |            |
| Duration of follow-up                                 | 0.3                       | 0.3       | 0.335      |
| Seizure outcome: Seizure-free                         | 10.3                      | 2.6       | <0.001 *** |
| Duration of follow-up * Seizure outcome: Seizure-free | 0.7                       | 0.4       | 0.093      |
| <b>Working Memory</b>                                 |                           |           |            |
| Duration of follow-up                                 | -0.2                      | 0.3       | 0.544      |
| Seizure outcome: Seizure-free                         | 10.3                      | 2.5       | <0.001 *** |
| Duration of follow-up * Seizure outcome: Seizure-free | 1.0                       | 0.4       | 0.010 *    |
| <b>Processing Speed</b>                               |                           |           |            |
| Duration of follow-up                                 | -0.6                      | 0.4       | 0.131      |
| Seizure outcome: Seizure-free                         | 7.5                       | 2.7       | 0.006 **   |
| Duration of follow-up * Seizure outcome: Seizure-free | 0.8                       | 0.5       | 0.068      |
| <b>Reading</b>                                        |                           |           |            |
| Duration of follow-up                                 | -1.2                      | 0.5       | 0.015 *    |
| Seizure outcome: Seizure-free                         | 4.6                       | 2.9       | 0.117      |
| Duration of follow-up * Seizure outcome: Seizure-free | 1.6                       | 0.5       | 0.002 **   |
| <b>Spelling</b>                                       |                           |           |            |
| Duration of follow-up                                 | -0.1                      | 0.5       | 0.850      |
| Seizure outcome: Seizure-free                         | 7.3                       | 3.0       | 0.014 *    |
| Duration of follow-up * Seizure outcome: Seizure-free | 0.6                       | 0.5       | 0.220      |
| <b>Numeracy</b>                                       |                           |           |            |
| Duration of follow-up                                 | -0.5                      | 0.5       | 0.382      |
| Seizure outcome: Seizure-free                         | 13.9                      | 3.2       | <0.001 *** |
| Duration of follow-up * Seizure outcome: Seizure-free | -0.6                      | 0.6       | 0.268      |

Abbreviations: SE = standard error.

\*p <0.05

\*\*p <0.01

\*\*\*p <0.001

**A**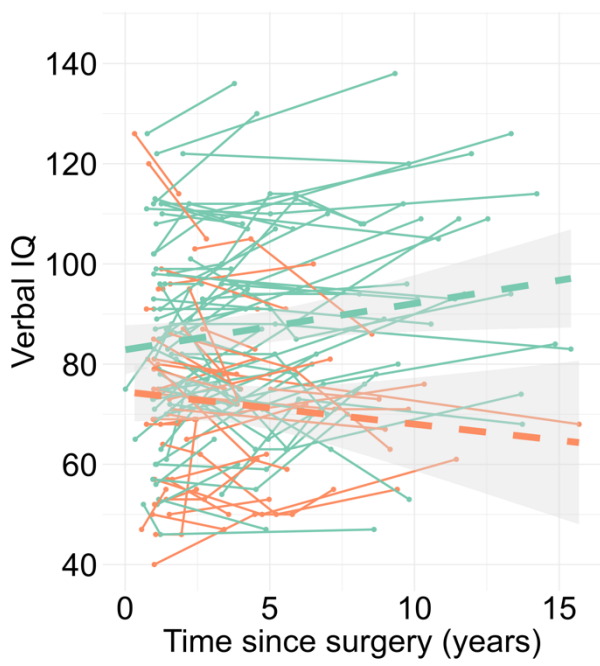**B**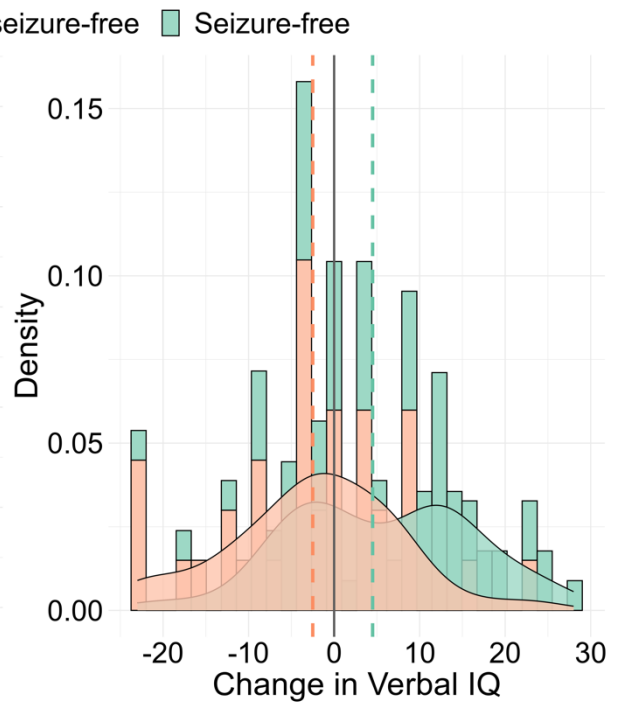**A**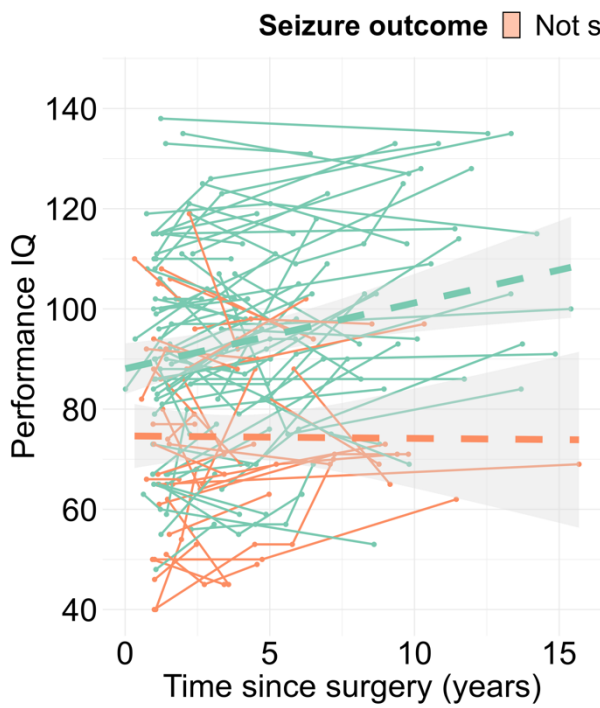**B**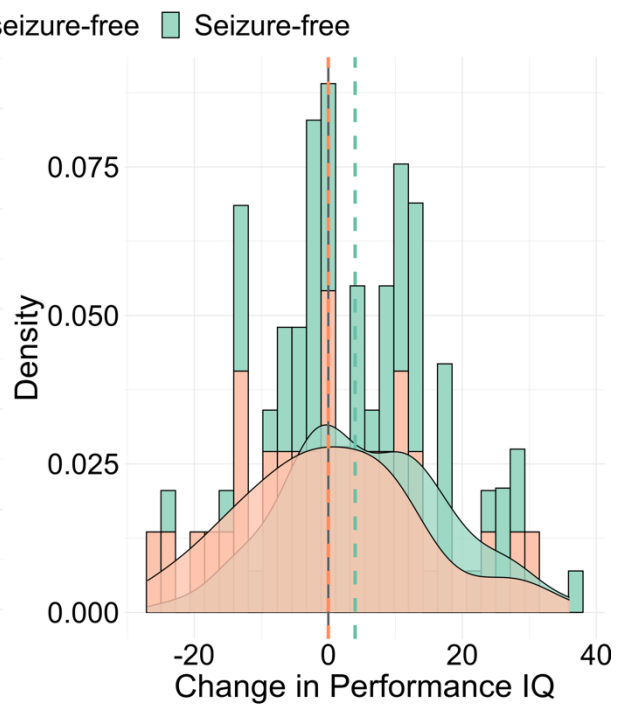

**A**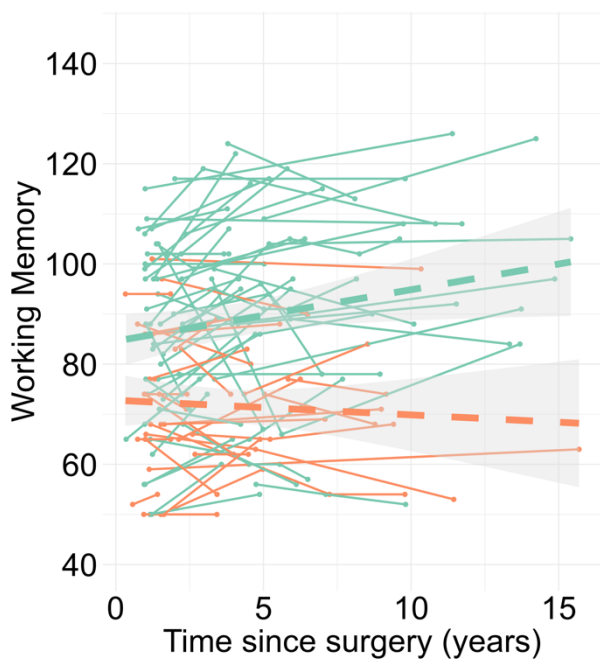**B**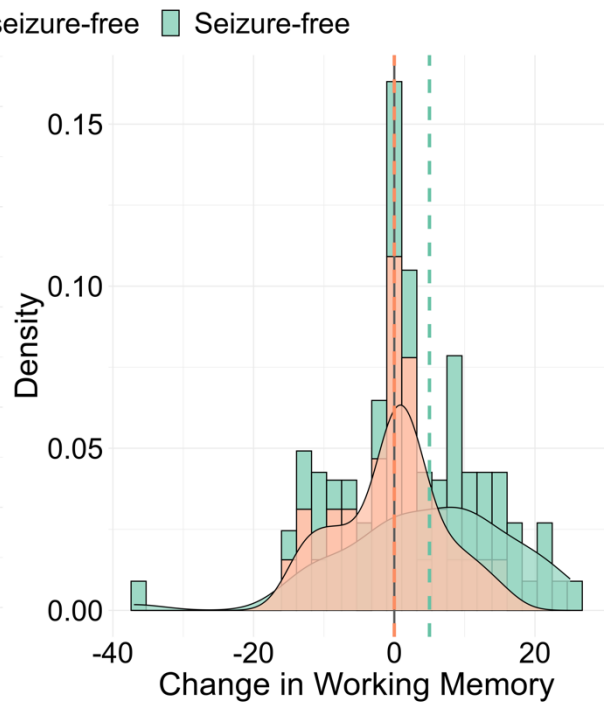**A**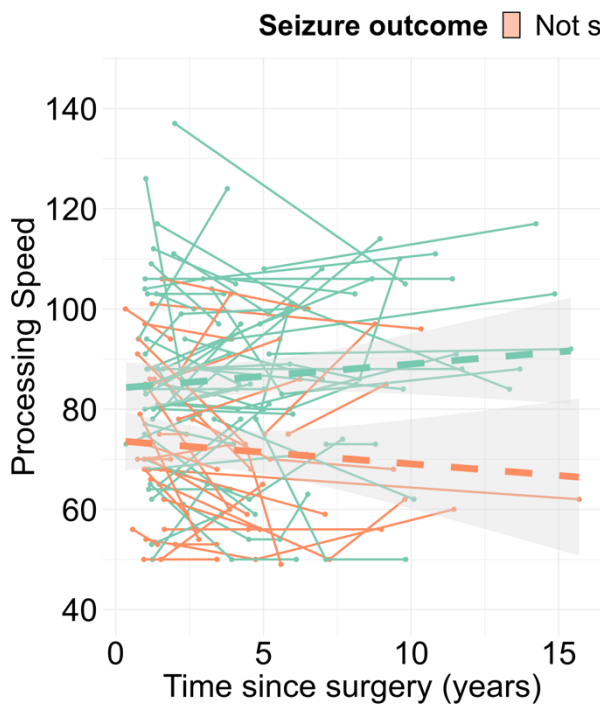**B**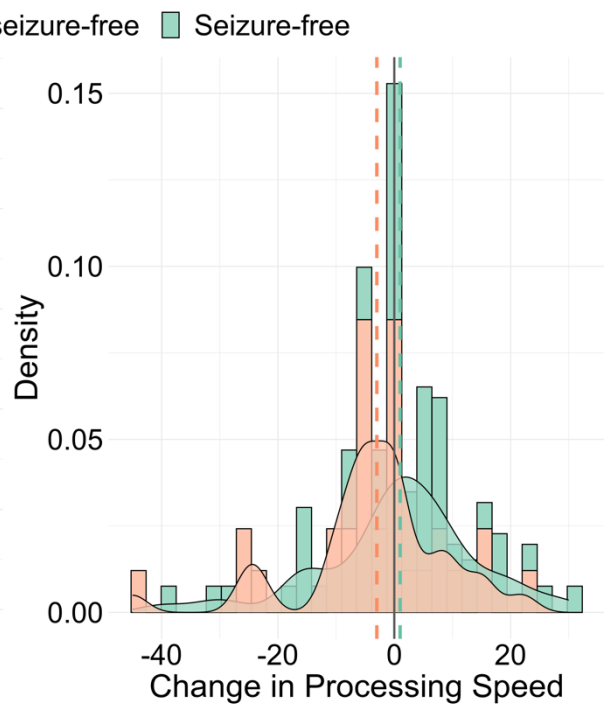



**A**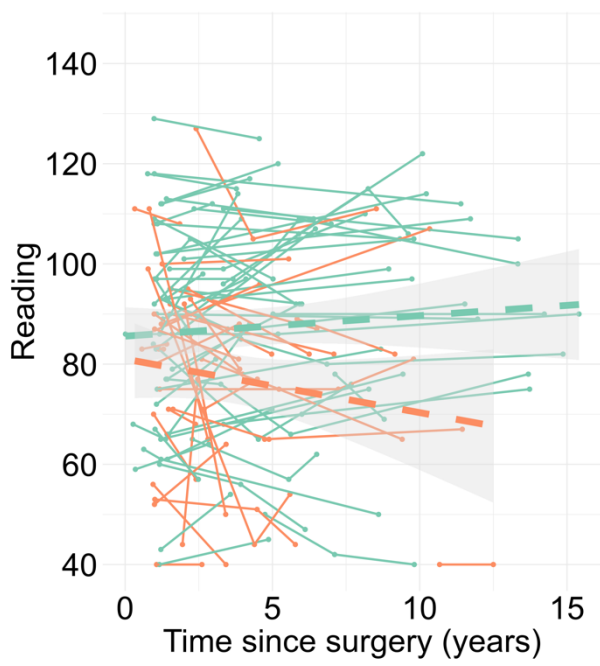**B**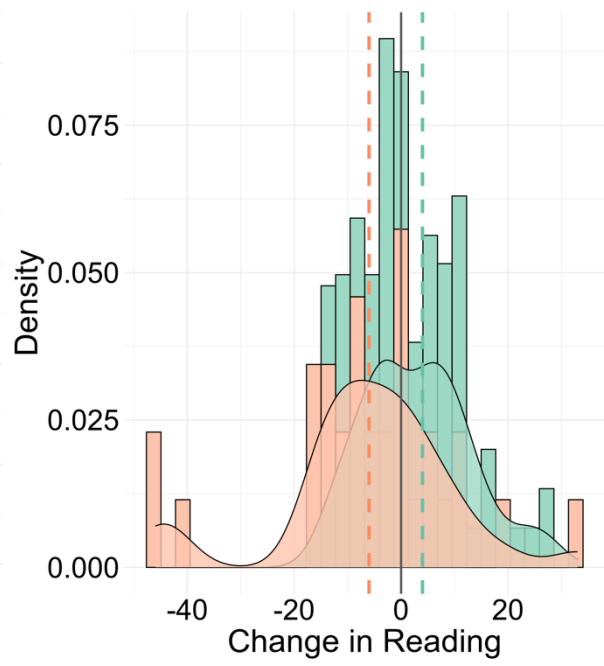**A**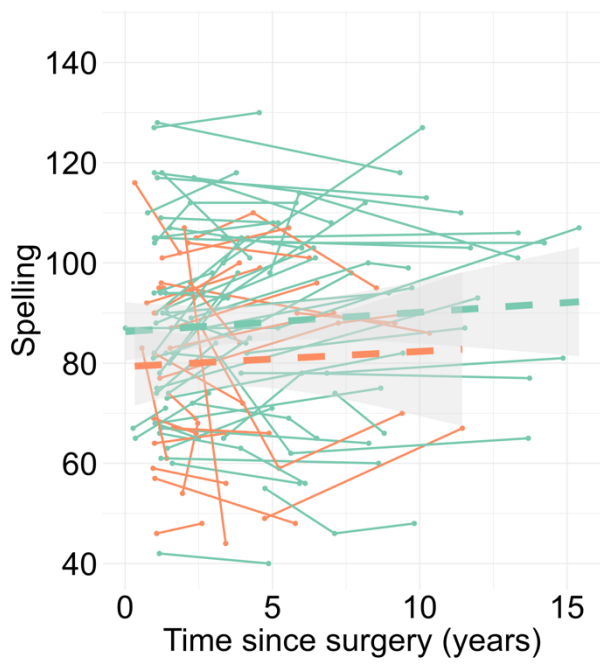**B**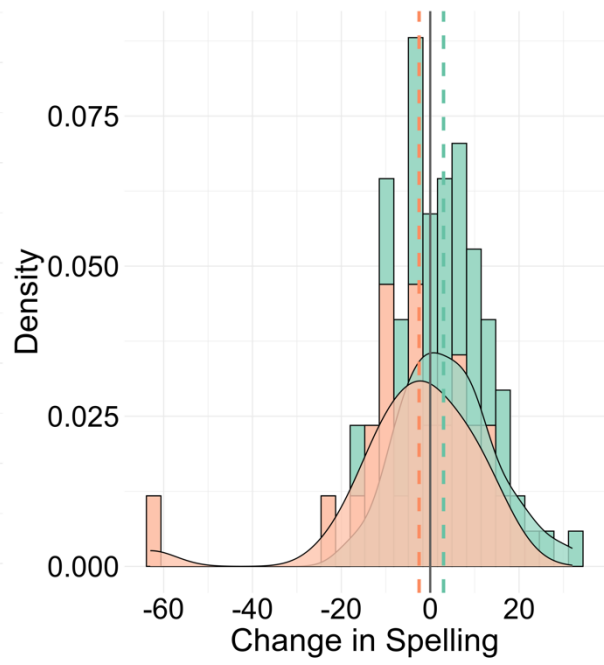

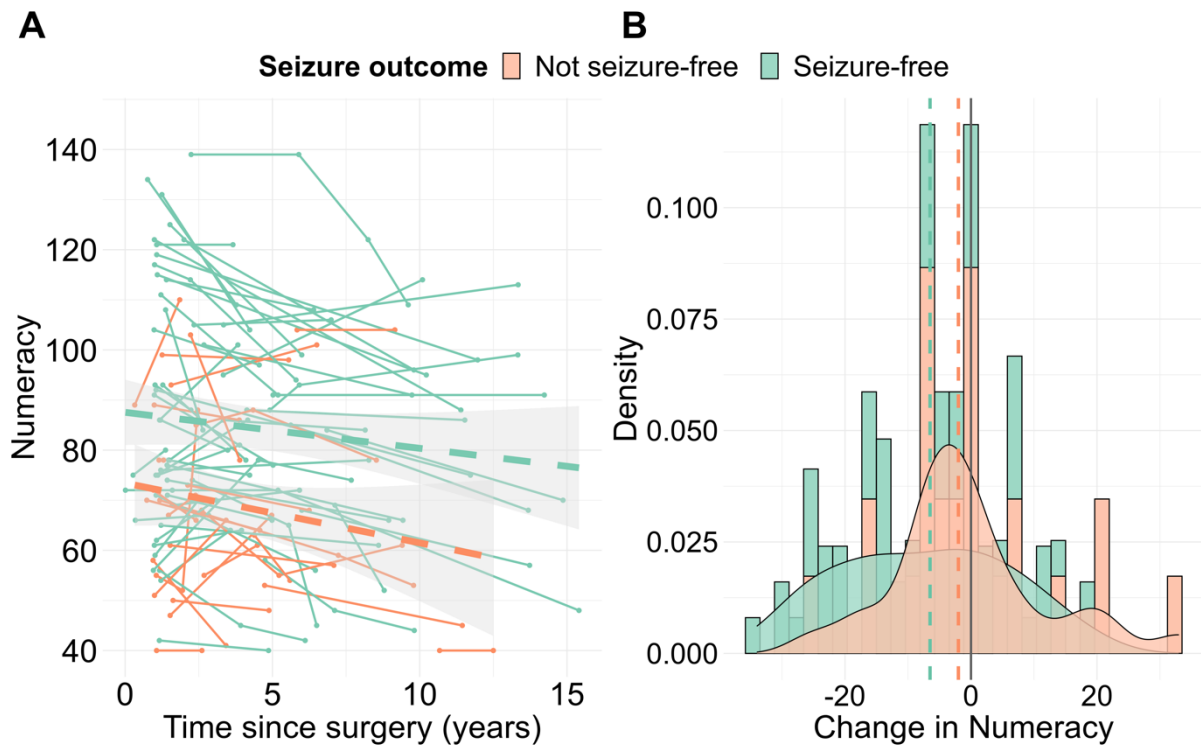

**Supplementary Fig. 3. Postoperative changes in neuropsychological performance (A)** Longitudinal postoperative trajectories in Verbal IQ, Performance IQ, Working Memory, Processing Speed, Reading, Spelling, and Numeracy in seizure-free (green) versus not seizure-free (orange) patients. Only patients with two or more postoperative assessments were included. All postoperative assessments were included for each patient. Linear modelling was fitted to all data points, according to seizure outcome (dotted green lines for patients who were seizure-free and dotted orange lines for patients who were not seizure-free); shaded areas represent the 95% confidence intervals. **(B)** Individual change in postoperative Verbal IQ, Performance IQ, Working Memory, Processing Speed, Reading, Spelling, and Numeracy in seizure-free (green) versus not seizure-free (orange) patients. The distribution of change scores is represented using a density plot. The change score for each patient was computed by subtracting the patient's first postoperative score from their last postoperative score. The median change scores are displayed with green dashed lines (in seizure-free patients) and with orange dashed lines (in not seizure-free patients). Only patients with two or more postoperative assessments were included in the visualisation.

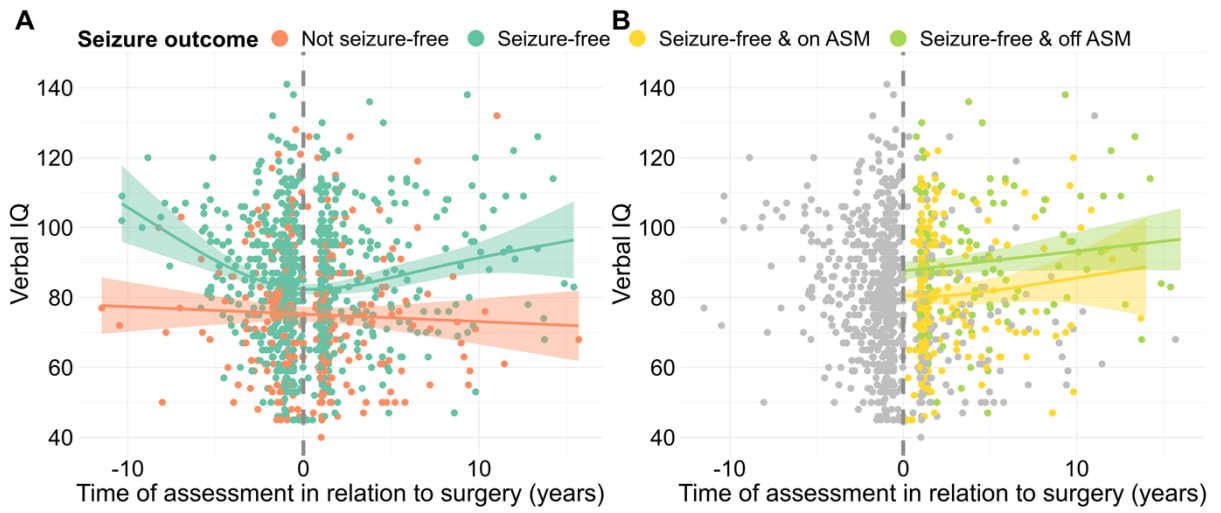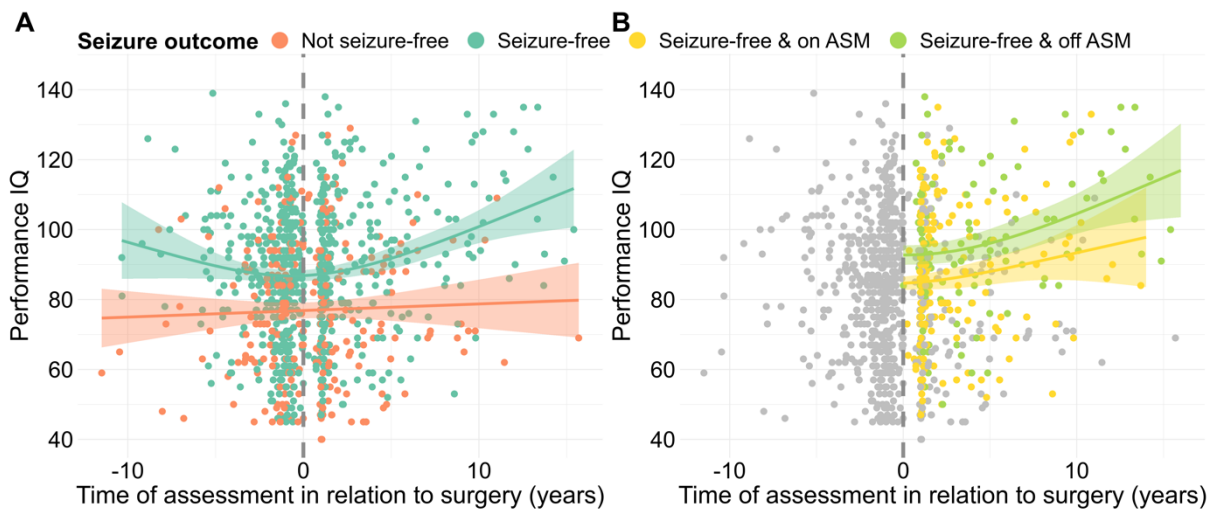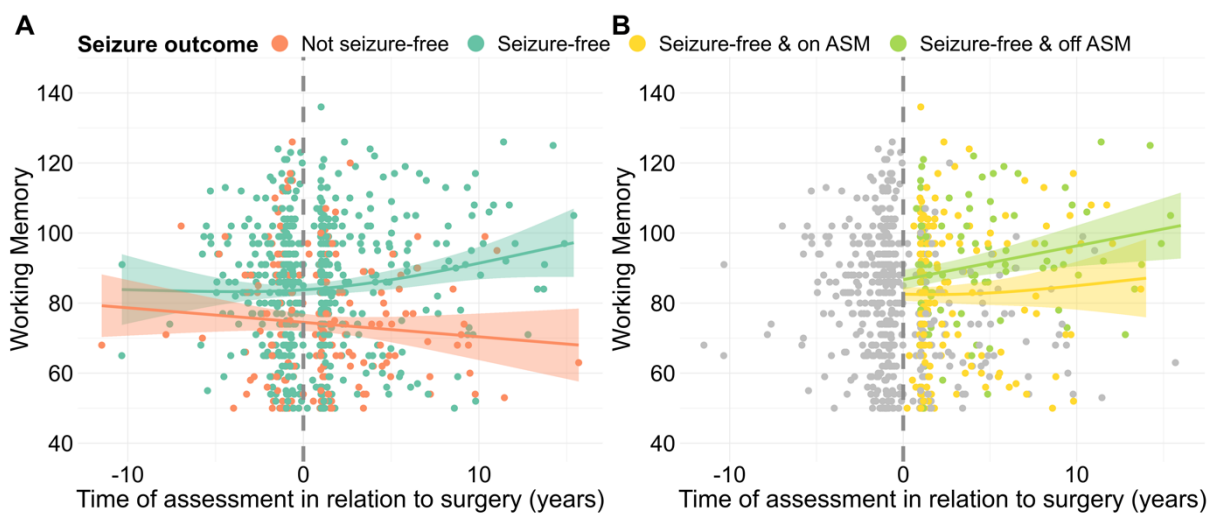

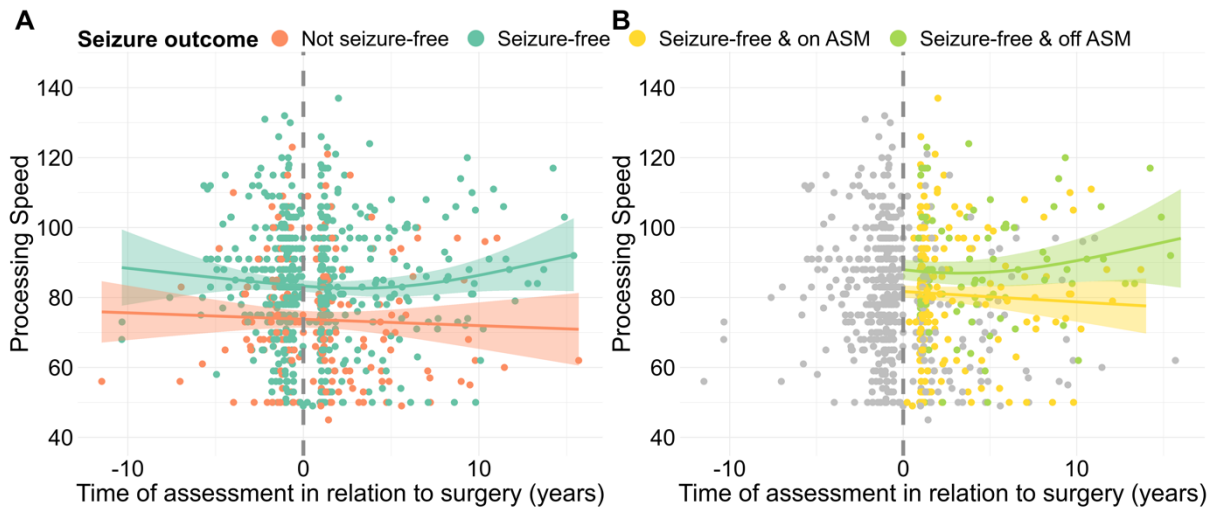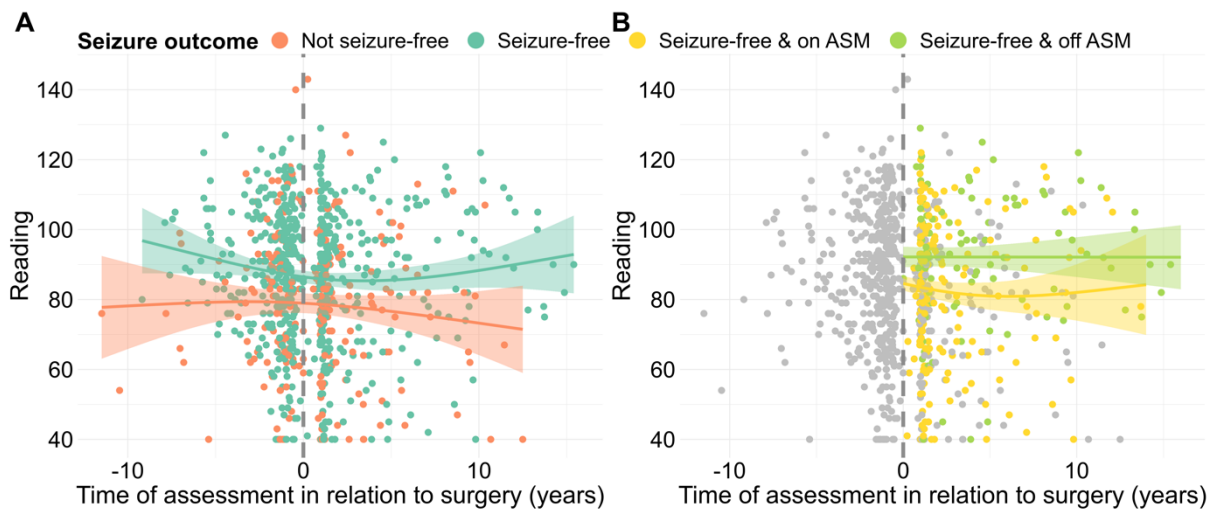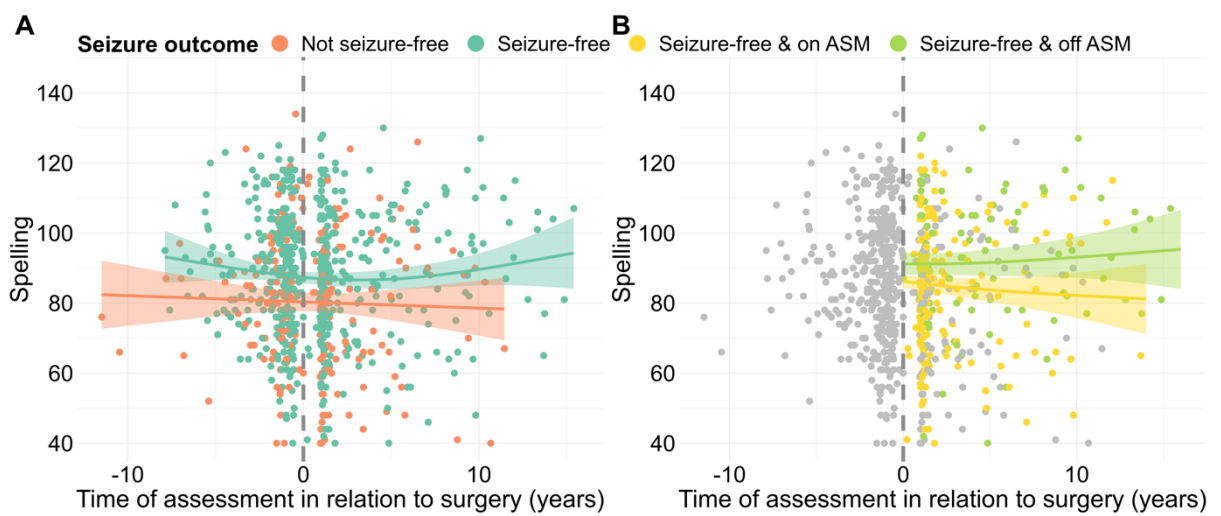

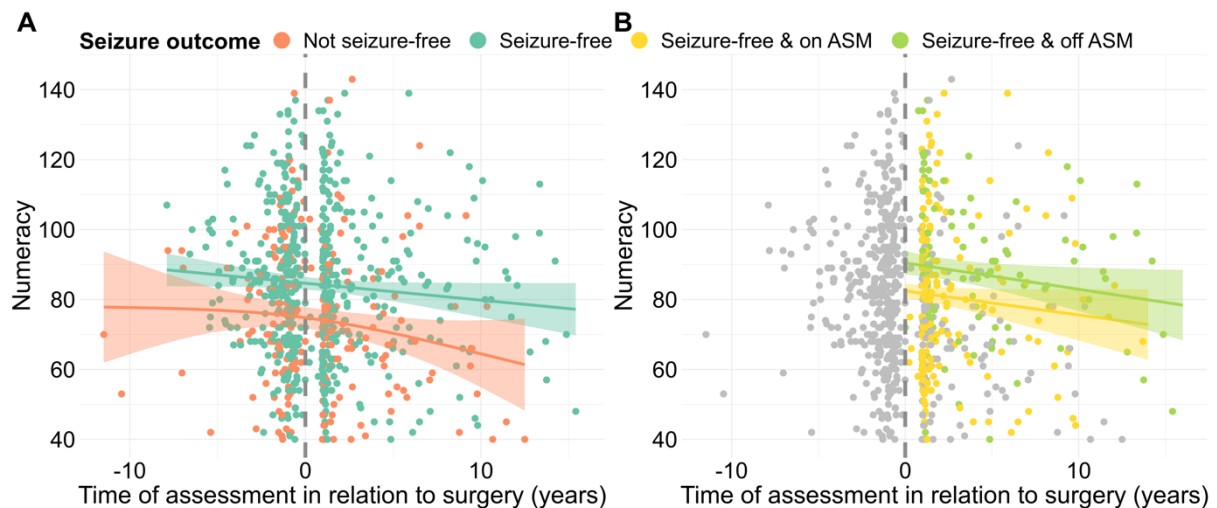

**Supplementary Fig. 4. Pre- to postoperative changes in neuropsychological performance**

**(A)** Pre- and postoperative trajectories in Verbal IQ, Performance IQ, Working Memory, Processing Speed, Reading, Spelling, and Numeracy in seizure-free (green) versus not seizure-free (orange) patients. All patients were included in the visualisation, irrespective of whether they had one or multiple pre- and/or postoperative assessments. If patients had multiple pre- and/or postoperative assessments, all assessments were included for each patient. Generalised additive modelling was fitted to all data points, according to seizure outcome (solid green lines for patients who were seizure-free and solid orange lines for patients who were not seizure-free); shaded areas represent the 95% confidence intervals. **(B)** Pre- and postoperative trajectories in Verbal IQ, Performance IQ, Working Memory, Processing Speed, Reading, Spelling, and Numeracy in seizure-free patients who were still receiving ASMs (yellow) versus no longer receiving ASMs (light green). Grey points represent performance in the preoperative period as well as performance for patients who did not become seizure-free postoperatively. All patients were included in the visualisation, irrespective of whether they had one or multiple pre- and/or postoperative assessments. If patients had multiple pre- and/or postoperative assessments, all assessments were included for each patient. Generalised additive modelling was fitted to all data points, according to postoperative ASM status (solid yellow lines for patients who were still receiving ASMs and solid light green for patients who were no longer receiving ASMs); shaded areas represent the 95% confidence intervals.

Abbreviations: ASM = antiseizure medication.

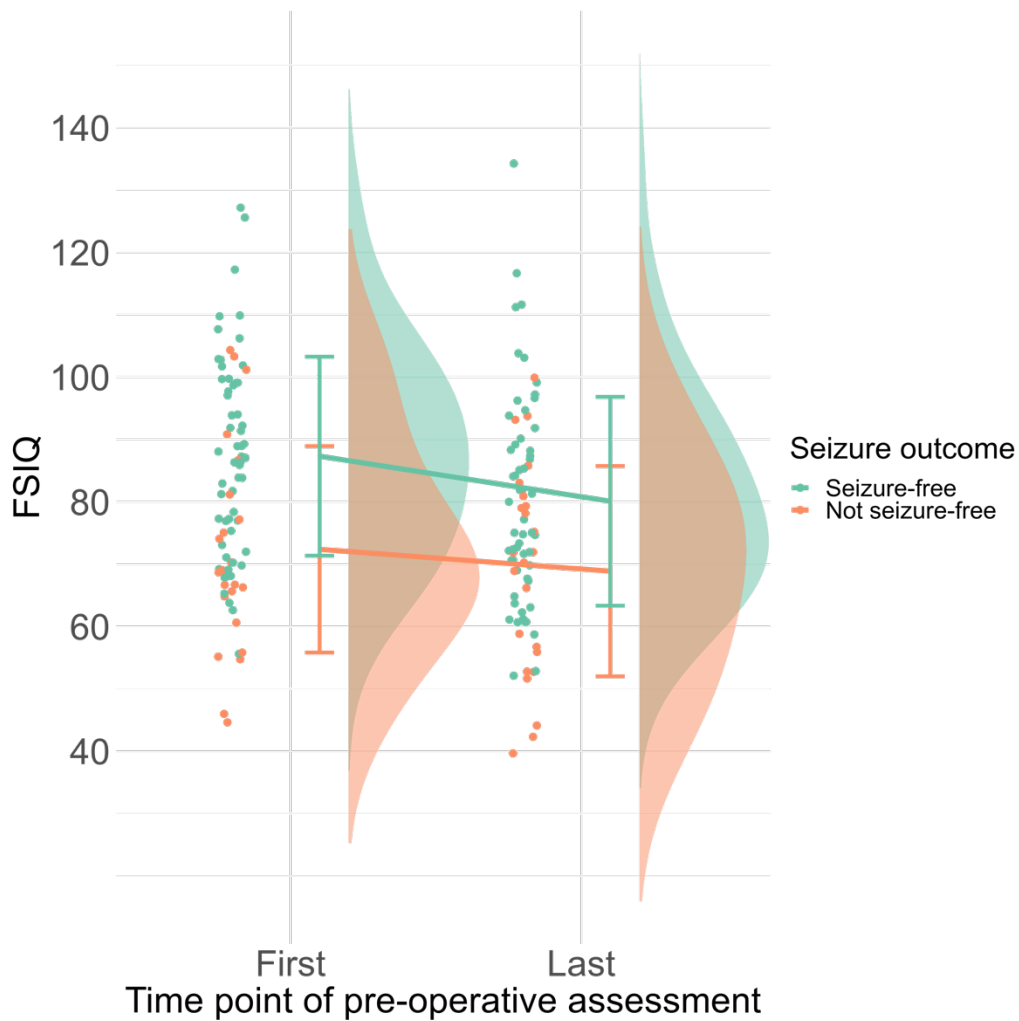

**Supplementary Fig. 5.** Raincloud plots show the raw data and density functions for FSIQ at first and last preoperative assessment. The lines adjacent to the density functions show the mean and standard error for the groups (connected between the two time points with hashed lines). Only patients with multiple preoperative assessments were included. Patients who became seizure-free postoperatively performed significantly better at both first and last preoperative assessment compared to those patients who did not become seizure-free. Patients also showed higher performance on their first preoperative assessment compared to their last preoperative assessment.

Abbreviations: FSIQ = Full-Scale IQ.

**Supplementary Table 12.** Two-way ANOVAs investigating the possible interaction effects between time point of preoperative assessment and seizure outcome in patients with multiple preoperative assessments.

|                            | Main effect –<br>time point of<br>preoperative<br>assessment | Main effect –<br>seizure outcome | Interaction effect between<br>time point of preoperative<br>assessment and seizure<br>outcome |
|----------------------------|--------------------------------------------------------------|----------------------------------|-----------------------------------------------------------------------------------------------|
| <b>IQ domains</b>          |                                                              |                                  |                                                                                               |
| FSIQ                       | p = 0.019                                                    | p <0.001                         | F(1,158) = 0.4, p = 0.511                                                                     |
| Verbal IQ                  | p = 0.007                                                    | p <0.001                         | F(1,234) = 0.3, p = 0.602                                                                     |
| Performance IQ             | p = 0.276                                                    | p <0.001                         | F(1,228) = 0.7, p = 0.414                                                                     |
| Working Memory             | p = 0.101                                                    | p = 0.278                        | F(1,222) = 0.0, p = 0.830                                                                     |
| Processing Speed           | p = 0.011                                                    | p <0.001                         | F(1,128) = 0.2, p = 0.660                                                                     |
| <b>Academic attainment</b> |                                                              |                                  |                                                                                               |
| Reading                    | p = 0.067                                                    | p <0.001                         | F(1,134) = 0.1, p = 0.735                                                                     |
| Spelling                   | p = 0.370                                                    | p = 0.135                        | F(1,116) = 0.0, p = 0.955                                                                     |
| Numeracy                   | p = 0.048                                                    | p = 0.200                        | F(1,102) = 0.1, p = 0.751                                                                     |

Abbreviations: FSIQ = Full-Scale IQ.

**Supplementary Table 13.** Comparison of seizure-free versus not seizure-free patients, with preoperative neuropsychological data.

|                                                                              |                                                                                                                                                                                                                                                                      |
|------------------------------------------------------------------------------|----------------------------------------------------------------------------------------------------------------------------------------------------------------------------------------------------------------------------------------------------------------------|
| Sex                                                                          | ns                                                                                                                                                                                                                                                                   |
| Handedness                                                                   | ns                                                                                                                                                                                                                                                                   |
| Educational status                                                           | ns                                                                                                                                                                                                                                                                   |
| Preoperative FSIQ                                                            | ns                                                                                                                                                                                                                                                                   |
| Family history of epilepsy                                                   | ns                                                                                                                                                                                                                                                                   |
| Genetic diagnosis of epilepsy                                                | ns                                                                                                                                                                                                                                                                   |
| Age of epilepsy onset                                                        | **<br>Seizure-free patients had an older age of epilepsy onset;<br>$Md_{\text{seizure-free}} = 4.0$ , $IQR_{\text{seizure-free}} = (2.0, 7.6)$ versus $Md_{\text{not seizure-free}} = 2.9$ , $IQR_{\text{not seizure-free}} = (2.0, 5.5)$                            |
| Age at surgery                                                               | ns                                                                                                                                                                                                                                                                   |
| Duration of epilepsy                                                         | ns                                                                                                                                                                                                                                                                   |
| History of infantile spasms                                                  | ns                                                                                                                                                                                                                                                                   |
| Spasms at time of preoperative evaluation                                    | ns                                                                                                                                                                                                                                                                   |
| History of GTC seizures                                                      | ns                                                                                                                                                                                                                                                                   |
| Number of seizure types at preoperative assessment                           | ns                                                                                                                                                                                                                                                                   |
| Number of ASMs at preoperative assessment                                    | ns                                                                                                                                                                                                                                                                   |
| Total number of ASMs trialled from epilepsy onset to preoperative evaluation | **<br>Seizure-free patients had trialled a fewer number of different ASMs over the course of their epilepsy;<br>$M_{\text{seizure-free}} = 4.4$ , $SD_{\text{seizure-free}} = 2.2$ versus $M_{\text{not seizure-free}} = 5.5$ , $SD_{\text{not seizure-free}} = 2.5$ |
| MRI laterality                                                               | ns                                                                                                                                                                                                                                                                   |
| Type of MRI abnormality                                                      | ***<br>Patients who were not seizure-free were more likely to have non-focal (diffuse or multifocal) MRI abnormalities or be MRI negative                                                                                                                            |
| Procedure type                                                               | ns                                                                                                                                                                                                                                                                   |
| Side operated on                                                             | ns                                                                                                                                                                                                                                                                   |
| Lobe operated on                                                             | ns                                                                                                                                                                                                                                                                   |
| Histopathology                                                               | ***<br>Patients who were not seizure-free were more likely to have a diagnosis of MCD-Other, Tuberous sclerosis, Vascular aetiology, and Non-specific epilepsy-associated changes.                                                                                   |
| Postoperative ASM status                                                     | ***<br>Patients who were seizure-free were more likely to be off ASMs postoperatively.                                                                                                                                                                               |



---

p-values were obtained following correction for multiple comparison using the Holm method.

Abbreviations: ASM = antiseizure medication; FCD-II = focal cortical dysplasia type II; FSIQ = Full-Scale IQ; GTC = generalised tonic-clonic seizures; ns = not significant.

\*p <0.05

\*\*p <0.01

\*\*\*p <0.001

**Supplementary Table 14.** Relationships between patient characteristics and neuropsychological functioning at different time points.

|                                                                                                         | Pre-operative trajectory<br>– relative rate of change |            |             | Performance at pre-operative assessment |                      |                      | Performance at first post-operative assessment |                      |                      | Performance at last post-operative assessment |                      |                      | Change from pre- to first post-operative assessment |                       |             | Change from pre- to last post-operative assessment |                       |                       | Post-operative trajectory<br>– relative rate of change |          |          |
|---------------------------------------------------------------------------------------------------------|-------------------------------------------------------|------------|-------------|-----------------------------------------|----------------------|----------------------|------------------------------------------------|----------------------|----------------------|-----------------------------------------------|----------------------|----------------------|-----------------------------------------------------|-----------------------|-------------|----------------------------------------------------|-----------------------|-----------------------|--------------------------------------------------------|----------|----------|
|                                                                                                         | FSIQ                                                  | VIQ        | PIQ         | FSIQ                                    | VIQ                  | PIQ                  | FSIQ                                           | VIQ                  | PIQ                  | FSIQ                                          | VIQ                  | PIQ                  | FSIQ                                                | VIQ                   | PIQ         | FSIQ                                               | VIQ                   | PIQ                   | FSIQ                                                   | VIQ      | PIQ      |
| Right-handed (versus Left-handed/ Ambidextrous/ Handedness not established)                             | -0.13                                                 | -0.05      | 0.03        | 0.19<br>*                               | 0.16<br>*            | 0.18<br>*            | 0.21<br>*                                      | 0.13                 | 0.14                 | 0.13                                          | 0.10                 | 0.10                 | -0.07                                               | 0.04                  | 0.05        | -0.06                                              | 0.05                  | -0.03                 | -0.29                                                  | -0.03    | -0.23    |
| Mainstream school (versus Mainstream school with support /SEN/ Not attending school/ Not of school age) | 0.32<br>*                                             | 0.14       | 0.25<br>*   | 0.60<br><i>h</i> ***                    | 0.54<br><i>h</i> *** | 0.56<br><i>h</i> *** | 0.58<br><i>h</i> ***                           | 0.58<br><i>h</i> *** | 0.55<br><i>h</i> *** | 0.58<br><i>h</i> ***                          | 0.54<br><i>h</i> *** | 0.52<br><i>h</i> *** | 0.00                                                | 0.00                  | -0.06       | 0.00                                               | -0.03                 | -0.10                 | -0.06                                                  | 0.21     | -0.23    |
| Initial performance <sup>a</sup>                                                                        | -0.26<br>*                                            | -0.19<br>* | -0.25<br>** | -                                       | -                    | -                    | 0.86<br><i>h</i> ***                           | 0.84<br><i>h</i> *** | 0.82<br><i>h</i> *** | 0.82<br><i>h</i> ***                          | 0.80<br><i>h</i> *** | 0.78<br><i>h</i> *** | -0.21<br>**                                         | -0.34<br><i>h</i> *** | -0.17<br>** | -0.15                                              | -0.33<br><i>h</i> *** | -0.22<br><i>h</i> *** | 0.03                                                   | -0.09    | -0.21    |
| Family history of epilepsy (versus No family history of epilepsy)                                       | 0.08                                                  | 0.02       | -0.06       | 0.10                                    | 0.08                 | 0.09                 | 0.02                                           | -0.04                | 0.01                 | 0.07                                          | -0.06                | 0.02                 | 0.06                                                | -0.11                 | -0.09       | -0.02                                              | -0.15<br>*            | -0.10                 | -0.03                                                  | -0.10    | 0.06     |
| Genetic diagnosis of epilepsy (versus No genetic diagnosis)                                             | <i>n</i>                                              | <i>n</i>   | <i>n</i>    | -0.21                                   | -0.24                | -0.41                | -0.08                                          | -0.12                | -0.15                | -0.22                                         | -0.28                | -0.32                | -0.06                                               | -0.21                 | -0.44       | -0.15                                              | -0.30                 | -0.48                 | <i>n</i>                                               | <i>n</i> | <i>n</i> |
| Age of epilepsy onset                                                                                   | (1)                                                   | (1)        | (1)         | (1)                                     | (1)                  | (1)                  | (1)                                            | (1)                  | (1)                  | (1)                                           | (1)                  | (1)                  | (1)                                                 | (1)                   | (1)         | (1)                                                | (1)                   | (1)                   | (1)                                                    | (1)      | (1)      |
| (1) No covariate                                                                                        | -0.15                                                 | -0.07      | 0.08        | 0.26<br><i>h</i> ***                    | 0.22<br><i>h</i> *** | 0.26<br><i>h</i> *** | 0.30<br><i>h</i> ***                           | 0.24<br><i>h</i> *** | 0.28<br><i>h</i> *** | 0.29<br><i>h</i> ***                          | 0.25<br><i>h</i> *** | 0.27<br><i>h</i> *** | 0.04                                                | 0.04                  | -0.01       | 0.06                                               | 0.05                  | -0.01                 | 0.18                                                   | 0.02     | 0.16     |
| (2) Controlling for Age at surgery                                                                      | (2)                                                   | (2)        | (2)         | (2)                                     | (2)                  | (2)                  | (2)                                            | (2)                  | (2)                  | (2)                                           | (2)                  | (2)                  | (2)                                                 | (2)                   | (2)         | (2)                                                | (2)                   | (2)                   | (2)                                                    | (2)      | (2)      |
| (2) Controlling for Age at surgery                                                                      | -0.26<br>*                                            | -0.17      | -0.01       | 0.30<br><i>h</i> ***                    | 0.24<br><i>h</i> *** | 0.25<br><i>h</i> *** | 0.26<br><i>h</i> ***                           | 0.21<br><i>h</i> *** | 0.23<br><i>h</i> *** | 0.23<br><i>h</i> ***                          | 0.21<br><i>h</i> *** | 0.21<br><i>h</i> *** | -0.10                                               | -0.04                 | -0.07       | -0.07                                              | -0.04                 | -0.09                 | 0.25                                                   | 0.10     | 0.12     |
| (3) Controlling for Duration of epilepsy                                                                | (3)                                                   | (3)        | (3)         | (3)                                     | (3)                  | (3)                  | (3)                                            | (3)                  | (3)                  | (3)                                           | (3)                  | (3)                  | (3)                                                 | (3)                   | (3)         | (3)                                                | (3)                   | (3)                   | (3)                                                    | (3)      | (3)      |
| (3) Controlling for Duration of epilepsy                                                                | 0.00                                                  | 0.07       | 0.18        | 0.13<br>*                               | 0.12<br>*            | 0.20<br><i>h</i> *** | 0.27<br><i>h</i> ***                           | 0.19<br><i>h</i> *** | 0.25<br><i>h</i> *** | 0.27<br><i>h</i> ***                          | 0.22<br><i>h</i> *** | 0.27<br><i>h</i> *** | 0.26<br>**                                          | 0.12                  | 0.09        | 0.30<br>***                                        | 0.14<br>*             | 0.14<br>*             | 0.10                                                   | -0.06    | 0.20     |



|                                                                                                     | Pre-operative trajectory<br>– relative rate of change |            |       | Performance at pre-operative assessment |                       |                       | Performance at first post-operative assessment |                       |                       | Performance at last post-operative assessment |                       |                       | Change from pre- to first post-operative assessment |       |                      | Change from pre- to last post-operative assessment |            |             | Post-operative trajectory<br>– relative rate of change |           |                      |
|-----------------------------------------------------------------------------------------------------|-------------------------------------------------------|------------|-------|-----------------------------------------|-----------------------|-----------------------|------------------------------------------------|-----------------------|-----------------------|-----------------------------------------------|-----------------------|-----------------------|-----------------------------------------------------|-------|----------------------|----------------------------------------------------|------------|-------------|--------------------------------------------------------|-----------|----------------------|
|                                                                                                     | FSIQ                                                  | VIQ        | PIQ   | FSIQ                                    | VIQ                   | PIQ                   | FSIQ                                           | VIQ                   | PIQ                   | FSIQ                                          | VIQ                   | PIQ                   | FSIQ                                                | VIQ   | PIQ                  | FSIQ                                               | VIQ        | PIQ         | FSIQ                                                   | VIQ       | PIQ                  |
| Three or more seizure types at time of pre-operative evaluation (versus two or fewer seizure types) | 0.06                                                  | 0.02       | -0.03 | -0.26<br>*                              | -0.18<br>*            | -0.22<br>**           | -0.27                                          | -0.16                 | -0.13                 | -0.20                                         | -0.13                 | -0.08                 | -0.09                                               | -0.14 | -0.05                | -0.06                                              | -0.19      | -0.01       | -0.38                                                  | -0.07     | <i>n</i>             |
| Number of ASMs at pre-operative assessment                                                          | -0.14                                                 | -0.19<br>* | -0.11 | -0.26<br><i>h</i> ***                   | -0.19<br><i>h</i> *** | -0.28<br><i>h</i> *** | -0.35<br><i>h</i> ***                          | -0.27<br><i>h</i> *** | -0.33<br><i>h</i> *** | -0.36<br><i>h</i> ***                         | -0.29<br><i>h</i> *** | -0.32<br><i>h</i> *** | -0.12                                               | -0.12 | -0.19<br><i>h</i> ** | -0.15                                              | -0.12<br>* | -0.16<br>** | -0.23                                                  | -0.01     | 0.08                 |
| Total number of ASMs trialled from epilepsy onset to pre-operative evaluation                       | 0.02                                                  | -0.05      | -0.15 | -0.35<br><i>h</i> ***                   | -0.29<br><i>h</i> *** | -0.36<br><i>h</i> *** | -0.36<br><i>h</i> ***                          | -0.28<br><i>h</i> *** | -0.37<br><i>h</i> *** | -0.35<br><i>h</i> ***                         | -0.28<br><i>h</i> *** | -0.33<br><i>h</i> *** | -0.03                                               | -0.04 | -0.15<br>*           | 0.00                                               | -0.04      | -0.09       | -0.05                                                  | 0.07      | 0.17                 |
| Bilateral MRI abnormalities (versus unilateral MRI abnormalities)                                   | -0.06                                                 | -0.19      | -0.06 | -0.21                                   | -0.15                 | -0.18<br>*            | -0.28<br>*                                     | -0.16                 | -0.18                 | -0.35<br>*                                    | -0.21                 | -0.24<br>*            | -0.11                                               | -0.23 | -0.14                | -0.17                                              | -0.31<br>* | -0.24       | <i>n</i>                                               | <i>n</i>  | <i>n</i>             |
| Focal MRI abnormalities (versus Diffuse/Multifocal/Negative)                                        | 0.14                                                  | 0.11       | 0.19  | 0.38<br><i>h</i> ***                    | 0.27<br><i>h</i> ***  | 0.34<br><i>h</i> ***  | 0.42<br><i>h</i> ***                           | 0.31<br><i>h</i> ***  | 0.42<br><i>h</i> ***  | 0.45<br><i>h</i> ***                          | 0.33<br><i>h</i> ***  | 0.44<br><i>h</i> ***  | 0.03                                                | 0.08  | 0.13                 | 0.08                                               | 0.11       | 0.15<br>*   | 0.17                                                   | 0.03      | 0.02                 |
| Lesionectomy/<br>Lobectomy (versus Hemispherotomy/<br>Disconnection/<br>Corpus callosotomy)         | -                                                     | -          | -     | -                                       | -                     | -                     | 0.52<br><i>h</i> ***                           | 0.40<br><i>h</i> ***  | 0.55<br><i>h</i> ***  | 0.53<br><i>h</i> ***                          | 0.42<br><i>h</i> ***  | 0.59<br><i>h</i> ***  | 0.02                                                | 0.02  | 0.19<br>*            | 0.13                                               | 0.06       | 0.21<br>*   | 0.38                                                   | 0.37<br>* | 0.51<br><i>h</i> *** |
| Right-sided surgery (versus Left-sided surgery)                                                     | -                                                     | -          | -     | -                                       | -                     | -                     | -0.04                                          | 0.05                  | -0.12                 | -0.10                                         | 0.01                  | -0.20<br><i>h</i> **  | 0.00                                                | -0.03 | 0.00                 | -0.11                                              | -0.09      | -0.07       | -0.14                                                  | -0.19     | -0.19                |

|                                                        | Pre-operative trajectory<br>– relative rate of change |       |       | Performance at pre-operative assessment |       |       | Performance at first post-operative assessment |       |       | Performance at last post-operative assessment |       |       | Change from pre- to first post-operative assessment |       |       | Change from pre- to last post-operative assessment |       |       | Post-operative trajectory<br>– relative rate of change |          |          |
|--------------------------------------------------------|-------------------------------------------------------|-------|-------|-----------------------------------------|-------|-------|------------------------------------------------|-------|-------|-----------------------------------------------|-------|-------|-----------------------------------------------------|-------|-------|----------------------------------------------------|-------|-------|--------------------------------------------------------|----------|----------|
|                                                        | FSIQ                                                  | VIQ   | PIQ   | FSIQ                                    | VIQ   | PIQ   | FSIQ                                           | VIQ   | PIQ   | FSIQ                                          | VIQ   | PIQ   | FSIQ                                                | VIQ   | PIQ   | FSIQ                                               | VIQ   | PIQ   | FSIQ                                                   | VIQ      | PIQ      |
| Multilobar surgery<br>(versus Unilobar surgery)        | -                                                     | -     | -     | -                                       | -     | -     | -0.19                                          | -0.29 | -0.33 | -0.35                                         | -0.36 | -0.38 | -0.02                                               | -0.13 | -0.01 | -0.16                                              | -0.21 | -0.09 | <i>n</i>                                               | <i>n</i> | <i>n</i> |
| Aetiology: LEAT                                        | -0.14                                                 | 0.00  | 0.07  | 0.36                                    | 0.25  | 0.28  | 0.35                                           | 0.24  | 0.31  | 0.35                                          | 0.26  | 0.27  | 0.06                                                | 0.16  | 0.14  | 0.03                                               | 0.15  | 0.04  | 0.02                                                   | 0.11     | -0.06    |
| Aetiology: MTS                                         | 0.01                                                  | 0.02  | -0.01 | -0.10                                   | -0.15 | -0.03 | -0.03                                          | -0.15 | -0.07 | 0.04                                          | -0.09 | 0.07  | 0.03                                                | 0.00  | 0.00  | 0.23                                               | 0.06  | 0.20  | 0.33                                                   | -0.05    | 0.14     |
| Aetiology: FCD-II                                      | 0.29                                                  | 0.28  | 0.02  | -0.03                                   | 0.04  | -0.01 | -0.11                                          | 0.03  | 0.03  | 0.10                                          | 0.00  | 0.00  | 0.03                                                | -0.05 | 0.09  | -0.08                                              | -0.04 | 0.06  | <i>n</i>                                               | 0.22     | <i>n</i> |
| Aetiology:<br>Rasmussen<br>encephalitis                | <i>n</i>                                              | -0.43 | -0.37 | -0.41                                   | -0.28 | -0.45 | -0.55                                          | -0.32 | -0.68 | -0.58                                         | -0.29 | -0.66 | -0.28                                               | -0.01 | -0.56 | -0.35                                              | 0.12  | -0.39 | <i>n</i>                                               | <i>n</i> | <i>n</i> |
| Seizure-free (versus<br>Not seizure-free) <sup>c</sup> | -                                                     | -     | -     | -                                       | -     | -     | 0.37                                           | 0.24  | 0.27  | 0.47                                          | 0.32  | 0.34  | 0.12                                                | 0.09  | 0.13  | 0.33                                               | 0.24  | 0.23  | 0.44                                                   | 0.36     | 0.21     |
| Off ASM (versus<br>Receiving ASM/<br>Weaning ASM)      | -                                                     | -     | -     | -                                       | -     | -     | 0.32                                           | 0.25  | 0.27  | 0.32                                          | 0.25  | 0.25  | -0.12                                               | -0.06 | 0.08  | 0.08                                               | 0.01  | 0.04  | <i>n</i>                                               | -0.06    | -0.11    |

Associations between demographic, clinical and surgical variables and neuropsychological functioning were investigated using Pearson's correlation coefficient, Spearman's rank correlation coefficient, and rank-biserial correlation coefficient, as appropriate. Age of epilepsy onset, age at surgery, and duration of epilepsy were analysed separately, using partial correlations, to take into account the intercorrelated nature between these clinical characteristics.

Abbreviations: ASM = antiseizure medication; FCD-II = focal cortical dysplasia type II; FSIQ = Full-Scale IQ; GTC = generalised tonic-clonic; LEAT = low-grade epilepsy-associated tumour; MTS = mesial temporal sclerosis; PIQ = Performance IQ; SEN = special educational needs; VIQ = Verbal IQ.

p-values were obtained prior to correction for multiple comparison using the Holm method, which was then applied sequentially to each column. <sup>h</sup> Denotes if the p-value survived correction for multiple comparison.

*n* = analysis not performed due to the comparison group having a sample size smaller than *N* = 10.

<sup>a</sup> For preoperative trajectory, this was the first assessment patients had had. For postoperative performance, this was the preoperative assessment closest to surgery (the last preoperative assessment). For postoperative trajectory, this was the postoperative performance closest to surgery (first postoperative assessment).

<sup>b</sup> For preoperative neuropsychology assessment, duration of epilepsy was calculated from time of epilepsy onset to time of neuropsychology assessment. For postoperative neuropsychology assessment, duration of epilepsy was calculated from time of epilepsy onset to time of surgery.

<sup>c</sup> For postoperative assessment, this was seizure outcome at one-year follow-up. For postoperative trajectories, this was seizure outcome at last follow-up.

\*p < 0.05

\*\*p < 0.01

\*\*\*p < 0.001

**Supplementary Table 15.** Neuropsychological functioning at first postoperative assessment in seizure-free patients not receiving ASMs versus receiving/weaning ASMs.

|                                                     | <b>Off ASM</b>            | <b>On ASM/Weaning</b>     |            |
|-----------------------------------------------------|---------------------------|---------------------------|------------|
|                                                     | <b>Score, Md [IQR]</b>    | <b>Score, Md [IQR]</b>    | <b>p</b>   |
|                                                     | (range)                   | (range)                   |            |
| <b>IQ domains</b>                                   |                           |                           |            |
| <b>FSIQ</b>                                         |                           |                           |            |
| <i>N</i> = 148 (Off ASM = 27; On ASM/Weaning = 121) | 87 [74, 100]<br>(49, 130) | 78 [66, 91]<br>(43, 122)  | 0.057      |
| <b>Verbal IQ</b>                                    |                           |                           |            |
| <i>N</i> = 225 (Off ASM = 42; On ASM/Weaning = 183) | 91 [71, 98]<br>(50, 130)  | 80 [67, 96]<br>(45, 126)  | 0.068      |
| <b>Performance IQ</b>                               |                           |                           |            |
| <i>N</i> = 205 (Off ASM = 35; On ASM/Weaning = 170) | 93 [82, 105]<br>(50, 127) | 86 [72, 100]<br>(40, 133) | 0.051      |
| <b>Working Memory</b>                               |                           |                           |            |
| <i>N</i> = 183 (Off ASM = 36; On ASM/Weaning = 147) | 91 [78, 102]<br>(56, 124) | 83 [68, 97]<br>(50, 136)  | 0.026<br>* |
| <b>Processing Speed</b>                             |                           |                           |            |
| <i>N</i> = 177 (Off ASM = 34; On ASM/Weaning = 143) | 88 [78, 102]<br>(50, 123) | 80 [68, 91]<br>(49, 121)  | 0.012<br>* |
| <b>Academic attainment</b>                          |                           |                           |            |
| <b>Reading</b>                                      |                           |                           |            |
| <i>N</i> = 191 (Off ASM = 30; On ASM/Weaning = 161) | 93 [75, 103]<br>(45, 121) | 85 [69, 97]<br>(40, 129)  | 0.158      |
| <b>Spelling</b>                                     |                           |                           |            |
| <i>N</i> = 178 (Off ASM = 29; On ASM/Weaning = 149) | 90 [76, 105]<br>(54, 118) | 86 [73, 98]<br>(40, 128)  | 0.181      |
| <b>Numeracy</b>                                     |                           |                           |            |
| <i>N</i> = 178 (Off ASM = 29; On ASM/Weaning = 149) | 94 [75, 106]<br>(56, 134) | 81 [65, 93]<br>(40, 139)  | 0.028<br>* |

Abbreviations: ASM = antiseizure medication; FSIQ = Full-Scale IQ.

\**p* < 0.05

\*\**p* < 0.01

\*\*\**p* < 0.001

**Supplementary Table 16.** Postoperative neuropsychological trajectories in seizure-free patients who were no longer receiving ASMs versus receiving or weaning ASMs.

|                                                                              | <b>Off ASM</b>                  | <b>On ASM/Weaning</b>            | <b>p</b>   |
|------------------------------------------------------------------------------|---------------------------------|----------------------------------|------------|
| <b>IQ domains</b>                                                            |                                 |                                  |            |
| <b>FSIQ</b><br><i>N</i> = 47 (Off ASM = 30; On ASM/Weaning = 17)             | 1.8 [0.3, 2.2]<br>(-1.1, 8.6)   | 1.2 [-0.6, 2.2]<br>(-2.4, 3.5)   | 0.211      |
| <b>Verbal IQ</b><br><i>N</i> = 63 (Off ASM = 39; On ASM/Weaning = 24)        | 1.3 [0.0, 3.1]<br>(-2.7, 7.0)   | -0.1 [-1.4, 2.0]<br>(-9.6, 5.4)  | 0.026<br>* |
| <b>Performance IQ</b><br><i>N</i> = 65 (Off ASM = 40; On ASM/Weaning = 25)   | 1.3 [-0.2, 2.7]<br>(-2.0, 10.6) | 0.0 [-2.0, 2.6]<br>(-6.1, 6.1)   | 0.205      |
| <b>Working Memory</b><br><i>N</i> = 51 (Off ASM = 30; On ASM/Weaning = 21)   | 1.4 [0.7, 2.9]<br>(-10.4, 9.0)  | 0.0 [-1.8, 1.9]<br>(-4.1, 4.8)   | 0.032<br>* |
| <b>Processing Speed</b><br><i>N</i> = 50 (Off ASM = 28; On ASM/Weaning = 22) | 0.7 [-0.1, 2.3]<br>(-4.3, 10.0) | 0.0 [-1.7, 2.0]<br>(-5.5, 6.4)   | 0.214      |
| <b>Academic attainment</b>                                                   |                                 |                                  |            |
| <b>Reading</b><br><i>N</i> = 50 (Off ASM = 28; On ASM/Weaning = 22)          | 0.9 [-0.2, 2.2]<br>(-1.1, 10.5) | -0.7 [-2.5, 1.9]<br>(-6.8, 4.7)  | 0.034<br>* |
| <b>Spelling</b><br><i>N</i> = 52 (Off ASM = 32; On ASM/Weaning = 20)         | 1.0 [-0.1, 2.4]<br>(-2.1, 7.8)  | -0.3 [-1.7, 1.5]<br>(-5.7, 5.0)  | 0.026<br>* |
| <b>Numeracy</b><br><i>N</i> = 53 (Off ASM = 32; On ASM/Weaning = 21)         | -1.1 [-1.9, 0.7]<br>(-8.3, 5.6) | -2.6 [-4.1, 0.4]<br>(-19.0, 7.5) | 0.200      |

Abbreviations: ASM = antiseizure medication; FSIQ = Full-Scale IQ.

\**p* < 0.05

\*\**p* < 0.01

\*\*\**p* < 0.001
